# Supplementary material
Source: PubMed Central journal article supplement (PMC6554747)
Supplement: NIHMS1019388-supplement-SI.pdf [file NIHMS1019388-supplement-SI.pdf]

## Engineering of chimeric polyketide synthases using SYNZIP docking domains

Maja Klaus<sup>ab</sup>, Alicia D. D'Souza<sup>b</sup>, Aleksandra Nivina<sup>b</sup>, Chaitan Khosla<sup>b\*</sup> and Martin Grninger<sup>a\*</sup>

<sup>a</sup> Institute of Organic Chemistry and Chemical Biology, Buchmann Institute for Molecular Life Sciences, Goethe University Frankfurt, Max-von-Laue-Str. 15, 60438 Frankfurt am Main, Germany

<sup>b</sup> Departments of Chemistry and Chemical Engineering and Stanford ChEM-H, Stanford University, Stanford, CA 94305

\* Corresponding author: gringer@chemie.uni-frankfurt.de, khosla@stanford.edu

### Supporting Information contents:

Figure S1. Structural model of DEBS M1 with and without SYNZIP docking domains

Figure S2. Sequence similarity analysis of DEBS modules and KS domains

Figure S3: LC-MS analysis of products produced by bimodular chimeric PKSs newly generated in this study

Figure S4: Analysis of protein purity by SDS-PAGE and SEC – single module acceptors

Figure S5: Analysis of protein purity by SDS-PAGE and SEC – covalent fusion acceptors

Figure S6: Analysis of protein purity by SDS-PAGE and SEC – DEBS M1 and its derivatives

Table S1: Plasmids and primers used in this study

Table S2: Amino acid sequences of proteins used in this study

Table S3: Yields of proteins used in this study

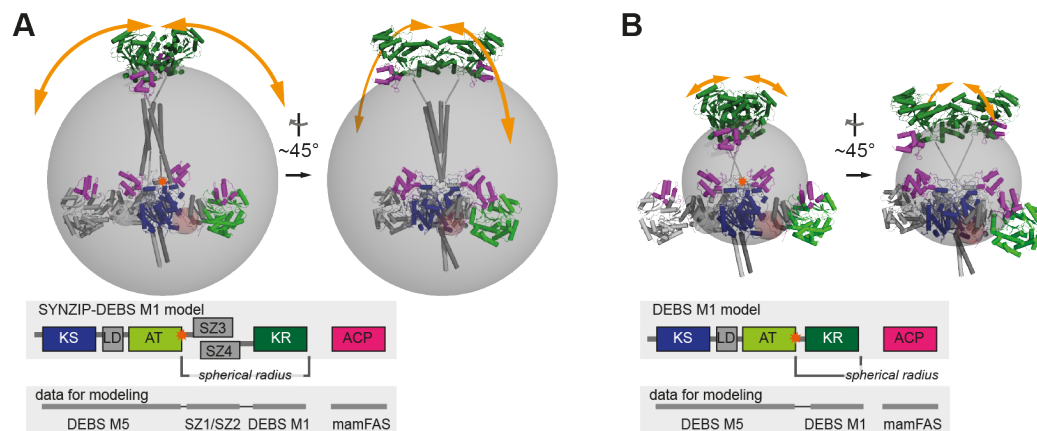

**Figure S1. Structural model of DEBS M1 with and without SYNZIP docking domains.** Structural models are based on X-ray crystallographic data of the KS-AT didomain of DEBS M5 (pdb 2HG4<sup>1</sup>), of the KR domain of DEBS M1 (pdb 2FR0<sup>2</sup>), and of the coiled-coil pair SYNZIP1:SYNZIP2 (pdb 3HE5<sup>3</sup>). The coiled-coil pair SYNZIP3:SYNZIP4 was modeled regarding data provided by Thompson *et al.*<sup>4</sup>. Linkers connecting the domains are not shown, but dashed lines indicate distances bridged by linkers (linkers lengths calculated with 3.6 Å per amino acid). ACP is shown in docking positions at KS, AT and KR as defined by Viegas *et al.* for mammalian FAS.<sup>5</sup> Please note that the model shows only the docked ACPs, but does not contain the ACP C-terminally attached to the KR. The relative orientation of domains bridged by linkers is not defined, and the positions and orientations of those domains were arbitrarily chosen. A) SYNZIP-bridged M1 model. The coiled-coil pair induces an elongated structure. The SYNZIP3:SYNZIP4-KR-ACP part is presumably conformationally highly flexible, because of flexible linkers and missing dimerizing elements (flexibility indicated by orange arrows). The grey sphere indicates the maximum conformational space of the C-terminal ACP (linked to KR, see Figure 2A and B). For illustration of the conformational space (shown for one protomer of the dimer), the distance between the attachment site of the coiled-coil pair at the AT domain and the attachment site of the ACP at the KR domain was used as the radius of a sphere (shown in grey; center of sphere indicated by orange star), notwithstanding more complex structural properties, as for example induced by the KS-AT didomain that constrains a free motion of the SYNZIP3:SYNZIP4-KR-ACP part. The structural model illustrates that the ACP can essentially reach any position of the KS-AT didomain in any orientation, including a “translocation site” revealed in a previously reported study<sup>6</sup>. The translocation site is highlighted by a red sphere (grey for other protomer). Docking at the translocation site may allow for direct transacylation of the acyl moiety from KS to ACP, which is discussed as side reaction. B) M1 model. The model has been designed as described above, including construct specific properties. According to the model, the conformational space of ACP is limited, and access to the translocation site prevented.

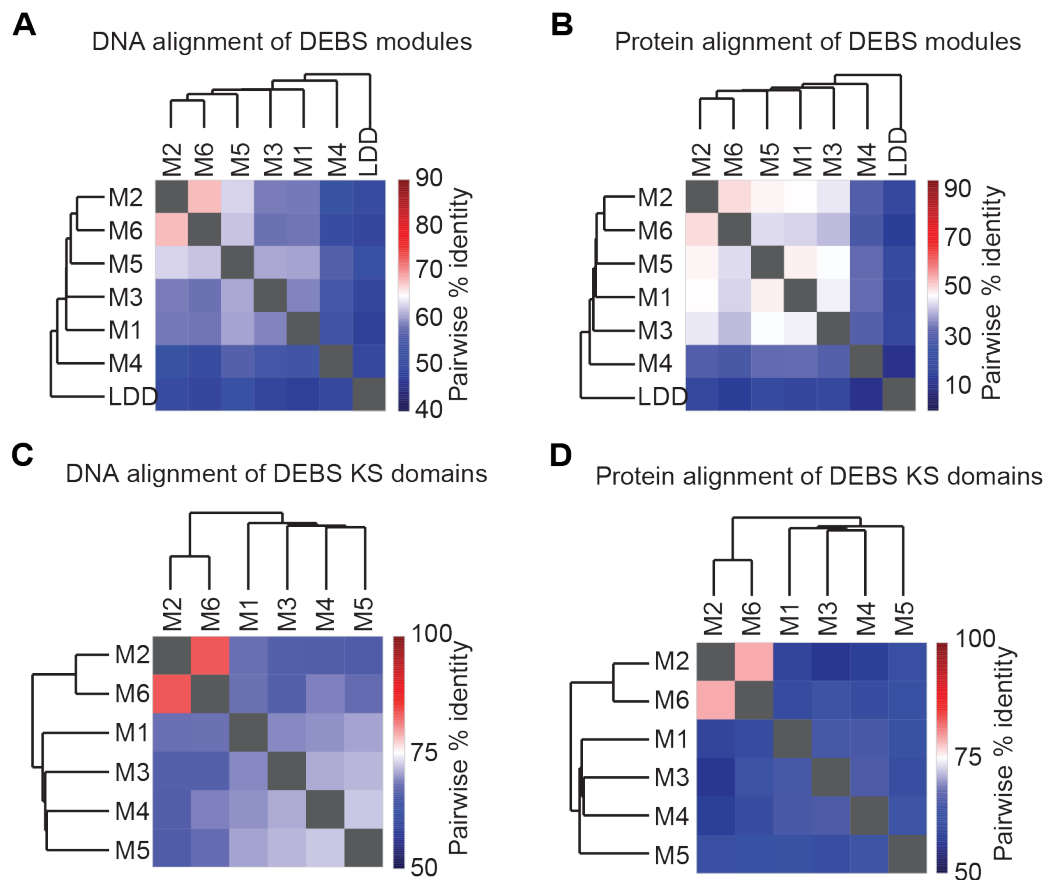

**Figure S2. Sequence similarity analysis of DEBS modules and KS domains.** Pairwise alignment of DNA and protein sequences of DEBS modules (A) and DEBS KS domains (B) are depicted as heatmaps.

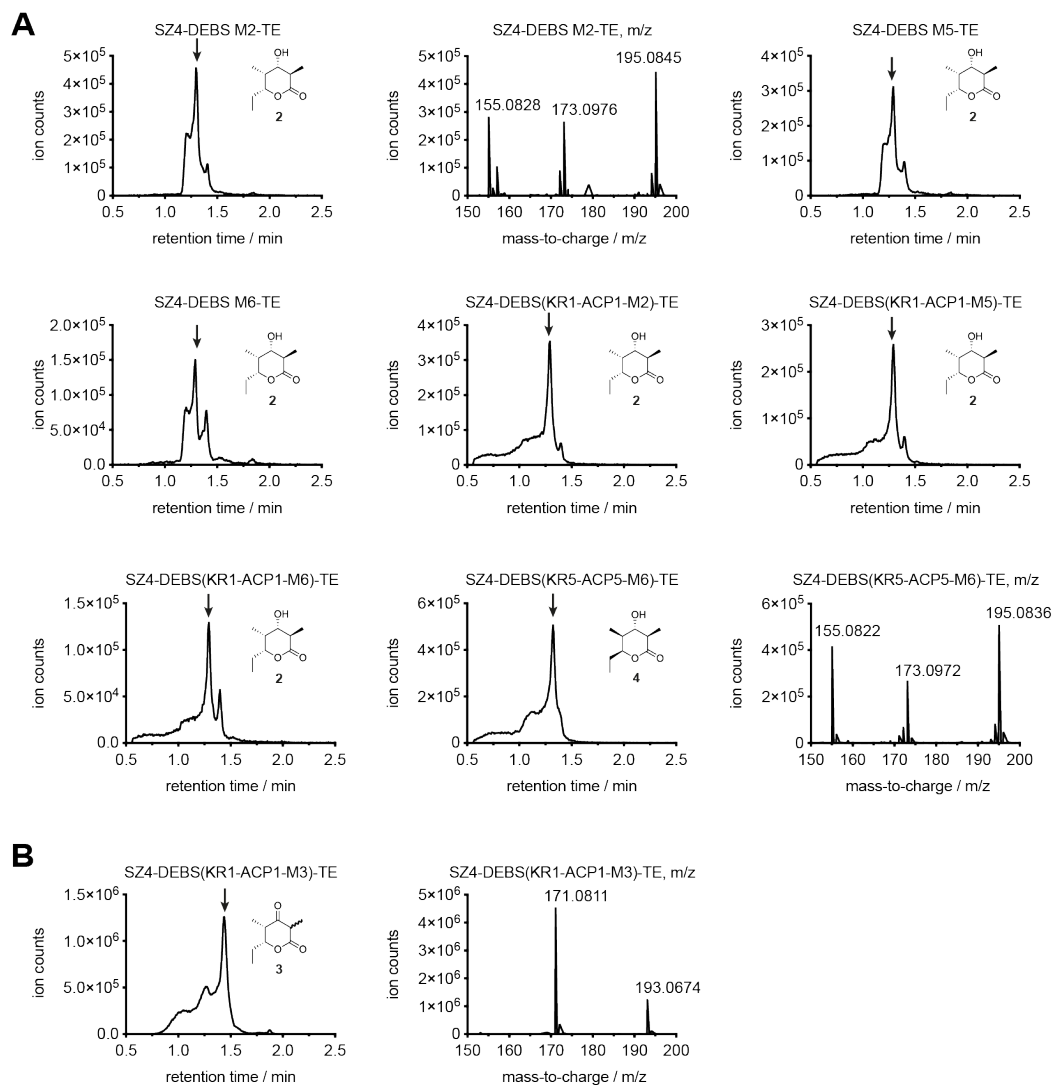

**Figure S3. LC-MS analysis of products produced by bimodular chimeric PKSs newly generated in this study.** A) Reduced triketide lactone products **2** and **4** ( $C_9H_{16}O_3$ , calculated MW 172.110) were detected in reaction mixtures containing SZ4-M2-TE, SZ4-M5-TE, SZ4-M6-TE, SZ4-KR1-ACP1-M2-TE, SZ4-KR1-ACP1-M5-TE, SZ4-KR1-ACP1-M6-TE, and SZ4-KR5-ACP5-M6-TE. B) Ketolactone **3** ( $C_9H_{14}O_3$ , calculated MW 170.090) was detected in reaction mixtures containing SZ4-KR1-ACP1-M3-TE. All PKS domain/modules are derived from DEBS. For all systems the extracted ion chromatograms were obtained by extraction of the  $[M+Na]^+$  species and one chromatogram per compound is shown as an example. Labeled peaks from left to right correspond to  $[M+H-H_2O]^+$ ,  $[M+H]^+$ , and  $[M+Na]^+$  ions. The peak of interest is marked with an arrow based on its mass spectrum.

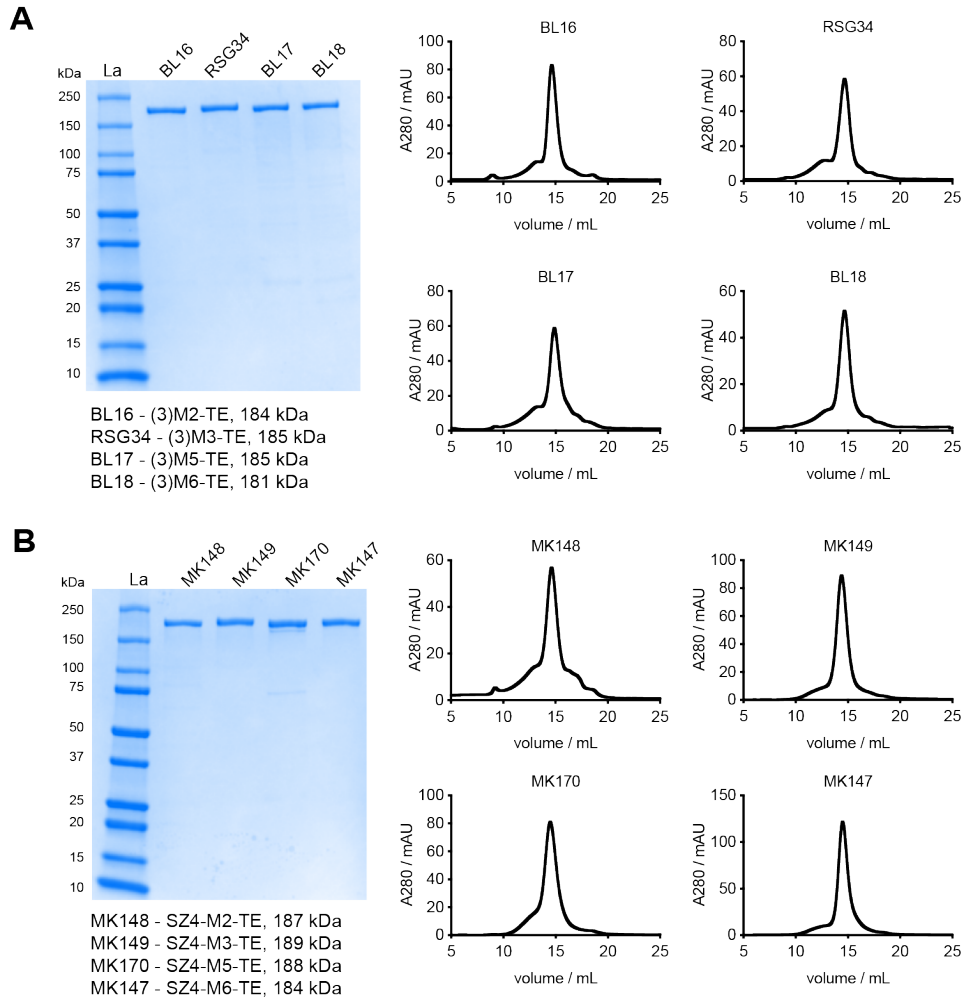

**Figure S4. Analysis of protein purity by SDS-PAGE and SEC – single module acceptors.** Acceptor proteins harboring a DEBS docking domain (A), and in comparison, a SZ domain (B). Protein abbreviations and their molecular weights (MW) are indicated. All proteins are pure and eluted in a predominately single peak from SEC.

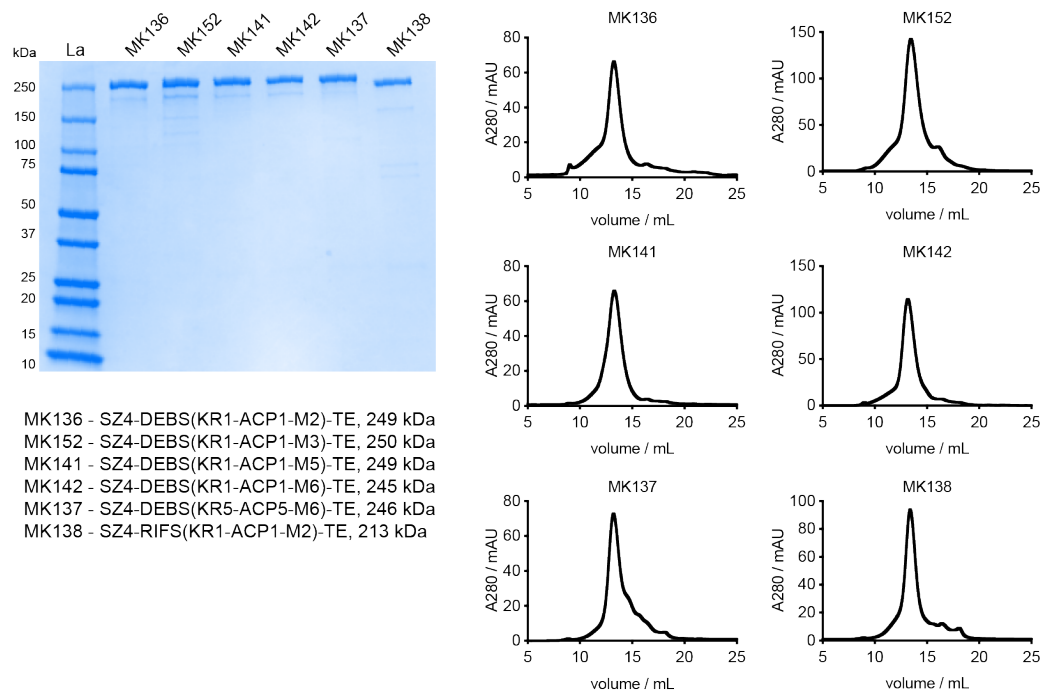

**Figure S5. Analysis of protein purity by SDS-PAGE and SEC – covalent fusion acceptors.** Acceptor proteins in which a KR-ACP fragment was fused to the acceptor module. Protein abbreviations and their MW are indicated. All proteins are pure and eluted in a predominately single peak from SEC.

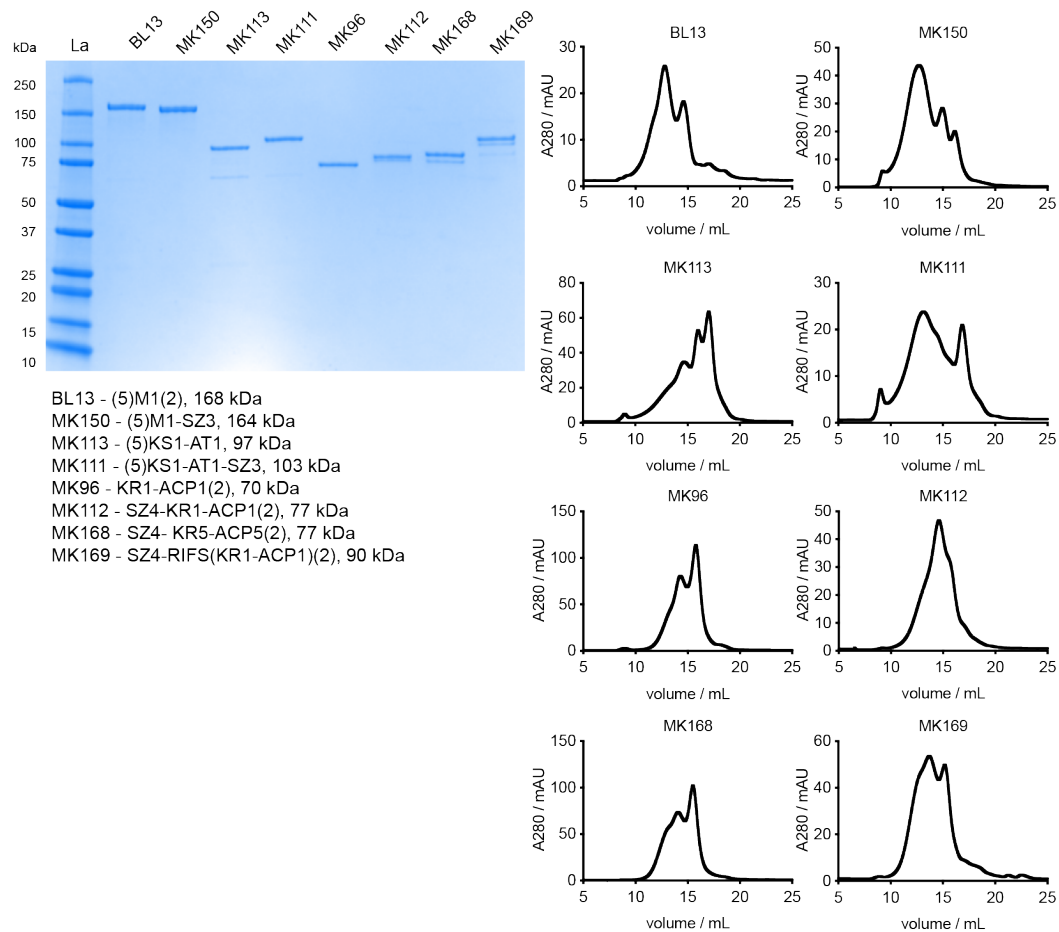

**Figure S6. Analysis of protein purity by SDS-PAGE and SEC – DEBS M1 and its derivatives.** DEBS M1 and its derivatives/fragments used in this study. If no indication is given the PKS domain/modules are derived from DEBS. Protein abbreviations and their MW are indicated. All proteins are pure, yet they appear as multiple oligomeric species based on SEC.

**Table S1: Plasmids and primers used in this study.** The cloning strategy is indicated for each construct. Some plasmids were only generated to function as intermediate constructs of the given cloning strategy and were not used for protein purification. If no indication is given the PKS domain/modules are derived from DEBS.

| Plasmid Encoded Protein                                           | Cloning Method | Cloning Fragments                            | Primer Name | Primer Sequence 5'-3'                           | Template |
|-------------------------------------------------------------------|----------------|----------------------------------------------|-------------|-------------------------------------------------|----------|
| pMK80 - ACP1-M5-TE, used to generate pADD02                       | Infusion       | 80_V1                                        | P-MK254     | CGCCTGGCTGGGCGGAGGG                             | pBL17    |
|                                                                   |                |                                              | P-MK239     | CATATGTATATCTCCTTCTTAAAGTTAAACAAAATTA           |          |
|                                                                   |                | 80_V2                                        | P-MK250     | GAGCCGATCGCGATCGTCGGCATGGCGT                    | pBL17    |
|                                                                   |                |                                              | P-MK255     | CACGCCCTGCGCGTACGCCTCGCC                        |          |
|                                                                   |                | 80_V3                                        | P-MK256     | GCGTACGCGCAGGGCGTG                              | pBL17    |
|                                                                   |                |                                              | P-MK253     | CCCTCCGCCCAGCCAGGCG                             |          |
| 80_I                                                              | P-MK236        | AAGAAGGAGATATACATATGCTGGCGTCGCTGCCCG         | pCK7        |                                                 |          |
|                                                                   | P-MK242        | CCGCGGGTGGGCGCGCTCGAGACCACCACCACCACCCTGAGATC |             |                                                 |          |
| pMK81 - ACP1-M6-TE, used to generate pMK93                        | Infusion       | 81_V1                                        | P-MK257     | GACCCGATCGCGATCGTCGGCATGGC                      | pBL18    |
|                                                                   |                |                                              | P-MK258     | CACGCCGTGCACGTGCGCCCGG                          |          |
|                                                                   |                | 81_V2                                        | P-MK249     | GCGCACGTGCACGGCGTG                              | pBL18    |
|                                                                   |                |                                              | P-MK239     | CATATGTATATCTCCTTCTTAAAGTTAAACAAAATTA           |          |
|                                                                   |                | 81_I                                         | P-MK236     | AAGAAGGAGATATACATATGCTGGCGTCGCTGCCCG            | pCK7     |
|                                                                   |                |                                              | P-MK246     | CCGACGATCGCGATCGGGTCGACGGGGCCCGTGGTC            |          |
| pMK83 - ACP1-M2-TE, used to generate pADD03                       | Infusion       | 83_V1                                        | P-MK250     | GAGCCGATCGCGATCGTCGGCATGGCGT                    | pBL17    |
|                                                                   |                |                                              | P-MK251     | GACACCGCGCGTGTGCGCGTCCG                         |          |
|                                                                   |                | 83_V2                                        | P-MK252     | CGCACACGCGCGGTGTC                               | pBL16    |
|                                                                   |                |                                              | P-MK253     | CCCTCCGCCCAGCCAGGCG                             |          |
|                                                                   |                | 83_V3                                        | P-MK254     | CGCCTGGCTGGGCGGAGGG                             | pBL16    |
|                                                                   |                |                                              | P-MK239     | CATATGTATATCTCCTTCTTAAAGTTAAACAAAATTA           |          |
| 80_I                                                              | P-MK236        | AAGAAGGAGATATACATATGCTGGCGTCGCTGCCCG         | pCK7        |                                                 |          |
|                                                                   | P-MK242        | CCGCGGGTGGGCGCGCTCGAGACCACCACCACCACCCTGAGATC |             |                                                 |          |
| pMK91-(5)KS1-AT1, used as a template for other cloning strategies | Infusion       | 91_V                                         | P-MK239     | CATATGTATATCTCCTTCTTAAAGTTAAACAAAATTA           | pBL13    |
|                                                                   |                |                                              | P-MK262     | TTTCCGCGCTGCGCTACCGCCTCGAGCACCACCACCAC          |          |
|                                                                   |                | 91_I1                                        | P-MK228     | GTGCAGCCCGTGATGTTGCGGGTCATGG                    | pBL13    |
|                                                                   |                |                                              | P-MK261     | GTGGTGGTGGTGCTCGAGGCGGTAGCGCAGCGCGGAAACCTCGT    |          |
|                                                                   |                | 91_I2                                        | P-MK229     | CCATGACCGGAACATCACGGGCTGCAC                     | pBL13    |
|                                                                   |                |                                              | P-MK260     | GAAGGAGATATACATATGAGCGGTGACAACGGCATGACCGAGGAAAA |          |



|                                                                           |                 |         |                              |                                                      |  |        |
|---------------------------------------------------------------------------|-----------------|---------|------------------------------|------------------------------------------------------|--|--------|
|                                                                           |                 |         |                              | G                                                    |  |        |
| pMK93 -<br>KR1-ACP1-M6-<br>TE, missing an<br>Asp in ACP1-<br>KS2 linker   | Infusion        | 93_V    | digestion of pMK81 with NdeI |                                                      |  | pAYC59 |
|                                                                           |                 | 93_I    | P-MK276                      | AAGGAGATATACATATGGACGAGGTTTCCGCGCTG                  |  |        |
|                                                                           |                 |         | P-MK277                      | AGCGACGCCAGCATATGCGCGCCCACCCGCGGTTTC                 |  |        |
| pMK96 -<br>KR1-ACP1(2)                                                    | Infusion        | 96_V    | P-MK239                      | CATATGTATATCTCCTTCTTAAAGTTAAACAAAATTA                |  | pBL13  |
|                                                                           |                 |         | P-MK62                       | GGCACCGAGGTCCGGG                                     |  |        |
|                                                                           |                 | 96_I    | P-MK276                      | AAGGAGATATACATATGGACGAGGTTTCCGCGCTG                  |  | pBL13  |
|                                                                           |                 |         | P-MK280                      | CCGGACCTCGGTGCCGAGTTCGGCGGCCAGGT                     |  |        |
| pMK111 -<br>(5)KS1-AT1-SZ3                                                | Infusion        | 111_V   | P-MK309                      | TCCGCCACCGGATCCGCCGAGCCAGACGCGCTCGC                  |  | pMK91  |
|                                                                           |                 |         | P-MK304                      | CTGGCACACAAAAGCTCGAGCACCACCACCAC                     |  |        |
|                                                                           |                 | 111_I   | P-MK308                      | GGATCCGGTGGCGGATCCGGTAACGAAGTTACAACACTTGAGAATGAC     |  | pfRSZ  |
|                                                                           |                 |         | P-MK303                      | CTTTTGTGTGCCAGTCTATTTCTCAAT                          |  |        |
| pMK112 -<br>SZ4-KR1-<br>ACP1(2)                                           | Infusion        | 112_V   | P-MK239                      | CATATGTATATCTCCTTCTTAAAGTTAAACAAAATTA                |  | pMK96  |
|                                                                           |                 |         | P-MK311                      | TCCGGTGGCGGATCCGGTGACGAGGTTTCCGCGCTG                 |  |        |
|                                                                           |                 | 112_I   | P-MK305                      | GGAGATATACATATGCAGAAAGTGGCTGAATTGAAAAACAGA           |  | pfRSZ  |
|                                                                           |                 |         | P-MK310                      | GGATCCGCCACCGGATCCGCCTTCAGCAACATCGTTCTCCAATCTG       |  |        |
| pMK113 -<br>(5)KS1-AT1<br>(shorter than<br>pMK91)                         | Infusion        | 113_V   | P-MK239                      | CATATGTATATCTCCTTCTTAAAGTTAAACAAAATTA                |  | pMK91  |
|                                                                           |                 |         | P-MK313                      | GAGCGCGTCTGGCTCCTCGAGCACCACCACCAC                    |  |        |
|                                                                           |                 | 113_I   | P-MK260                      | GAAGGAGATATACATATGAGCGGTGACAACGGCATGACCGAGGAAAA<br>G |  | pMK91  |
|                                                                           |                 |         | P-MK312                      | GAGCCAGACGCGCTCGC                                    |  |        |
| pADD02 -<br>KR1-ACP1-M5-<br>TE, missing an<br>Asp in ACP1-<br>KS2 linker  | Infusion        | ADD02_V | digestion of pMK80 with NdeI |                                                      |  | pAYC59 |
|                                                                           |                 | ADD02_I | P-MK276                      | AAGGAGATATACATATGGACGAGGTTTCCGCGCTG                  |  |        |
|                                                                           |                 |         | P-MK277                      | AGCGACGCCAGCATATGCGCGCCCACCCGCGGTTTC                 |  |        |
| pADD03 -<br>KR1-ACP1-M2-<br>TE - missing an<br>Asp in ACP1-<br>KS2 linker | Infusion        | ADD03_V | digestion of pMK83 with NdeI |                                                      |  | pAYC59 |
|                                                                           |                 | ADD03_I | P-MK276                      | AAGGAGATATACATATGGACGAGGTTTCCGCGCTG                  |  |        |
|                                                                           |                 |         | P-MK277                      | AGCGACGCCAGCATATGCGCGCCCACCCGCGGTTTC                 |  |        |
| pMK133 -<br>KR1-ACP1-M2-<br>TE, complete<br>ACP1-KS2 linker               | Quickchan<br>ge | 133_QC  | P-MK347                      | GCGACCACGGCCCCGTCGATGAGCCGATCGCGATCGTC               |  | pADD03 |
|                                                                           |                 |         | P-MK348                      | GACGATCGCGATCGGCTCATCGACGGGGGCCGTGGTTCG              |  |        |

|                                                                                     |                 |         |                                  |                                                              |        |
|-------------------------------------------------------------------------------------|-----------------|---------|----------------------------------|--------------------------------------------------------------|--------|
| pMK134 -<br>KR1-ACP1-M5-<br>TE, complete<br>ACP1-KS2 linker                         | Quickchan<br>ge | 134_QC  | P-MK347                          | GCGACCACGGCCCCCGTCGATGAGCCGATCGCGATCGTC                      | pADD02 |
|                                                                                     |                 |         | P-MK348                          | GACGATCGCGATCGGCTCATCGACGGGGGCCGTGGTCGC                      |        |
| pMK135 -<br>KR1-ACP1-M6-<br>TE, complete<br>ACP1-KS2 linker                         | Quickchan<br>ge | 135_QC  | P-MK349                          | GCGACCACGGCCCCCGTCGATGACCCGATCGCGATCGTC                      | pMK93  |
|                                                                                     |                 |         | P-MK350                          | GACGATCGCGATCGGGTCATCGACGGGGGCCGTGGTCGC                      |        |
| pMK136 -<br>SZ4-KR1-ACP1-<br>M2-TE                                                  | Infusion        | 136_V   | digestion of pMK133 with NdeI    |                                                              |        |
|                                                                                     |                 | 136_I   | P-MK351                          | GAAGGAGATATACATATGCAGAAAGTGGCTGAATTGAAAAAC                   | pMK112 |
|                                                                                     |                 |         | P-MK345                          | AGCGACGCCAGCATATGCGCGCCACCCGC                                |        |
| pMK137 -<br>SZ4-KR5-ACP5-<br>M6)-TE                                                 | Infusion        | 137_V   | P-MK247                          | GACCCGATCGCGATCGTC                                           | pMK93  |
|                                                                                     |                 |         | P-MK239                          | CATATGTATATCTCCTTCTTAAAGTTAAACAAAATTA                        |        |
|                                                                                     |                 | 137_I1  | P-MK351                          | GAAGGAGATATACATATGCAGAAAGTGGCTGAATTGAAAAAC                   | pMK112 |
|                                                                                     |                 |         | P-MK352                          | GCCGGTGGGGATGGGACCGGATCCGCCACCG                              |        |
|                                                                                     |                 | 137_I2  | P-MK353                          | CCCATCCCCACCGGCG                                             | pBL130 |
|                                                                                     |                 |         | P-MK354                          | GATCGCGATCGGGTCGTCGGCATCCTTCGGCAC                            |        |
| pMK138 -<br>SZ4-RIFS(KR1-<br>ACP1-M2)-TE                                            | Infusion        | 138_V   | P-MK358                          | GAGATCGGCACCGCCGCGGCCGAGGAGCCGATCGCGATCGTC                   | pAJ21  |
|                                                                                     |                 |         | P-MK239                          | CATATGTATATCTCCTTCTTAAAGTTAAACAAAATTA                        |        |
|                                                                                     |                 | 138_I1  | P-MK351                          | GAAGGAGATATACATATGCAGAAAGTGGCTGAATTGAAAAAC                   | pMK112 |
|                                                                                     |                 |         | P-MK355                          | GGGCTCGGCGGGCTCACCGGATCCGCCACCG                              |        |
|                                                                                     |                 | 138_I2  | P-MK356                          | GAGCCCGCCGAGCCC                                              | pAJ20  |
|                                                                                     |                 |         | P-MK357                          | GGCGGTGCCGATCTCGGCCGGCCGTTTCGCCCGGATCCGAAGAGCTT<br>GGCGCGCAG |        |
| pMK141 -<br>SZ4-KR1-ACP1-<br>M5-TE                                                  | Infusion        | 141_V   | digestion of pMK134 with NdeI    |                                                              |        |
|                                                                                     |                 | 136_I   | P-MK351                          | GAAGGAGATATACATATGCAGAAAGTGGCTGAATTGAAAAAC                   | pMK112 |
|                                                                                     |                 |         | P-MK345                          | AGCGACGCCAGCATATGCGCGCCACCCGC                                |        |
| pMK142 -<br>SZ4-KR1-ACP1-<br>M6-TE                                                  | Infusion        | 142_V   | digestion of pMK135 with NdeI    |                                                              |        |
|                                                                                     |                 | 136_I   | P-MK351                          | GAAGGAGATATACATATGCAGAAAGTGGCTGAATTGAAAAAC                   | pMK112 |
|                                                                                     |                 |         | P-MK345                          | AGCGACGCCAGCATATGCGCGCCACCCGC                                |        |
| pMK146 -<br>SZ4-MCS-H6,<br>intermediate<br>vector for various<br>cloning strategies | Infusion        | 146_all | P-MK386                          | TGCGGCCGCAAGCTTACCGGATCCGCCACCGG                             | pMK112 |
|                                                                                     |                 |         | P-MK387                          | AAGCTTGCGGCCGCACTC                                           |        |
| pMK147 -                                                                            | Infusion        | 147_V   | digestion of pMK146 with HindIII |                                                              |        |

|                                |          |       |                                  |                                    |        |
|--------------------------------|----------|-------|----------------------------------|------------------------------------|--------|
| SZ4-M6-TE                      |          | 147_I | P-MK388                          | CGGATCCGGTAAGCTTGACCCGATCGCGATCGTC | pMK137 |
|                                |          |       | P-MK389                          | GTGCGGCCGCAAGCTTCGAATTCCTCCGCCAG   |        |
| pMK148 - SZ4-M2-TE             | Infusion | 148_V | digestion of pMK146 with HindIII |                                    |        |
|                                |          | 148_I | P-MK390                          | CGGATCCGGTAAGCTTGAGCCGATCGCGATCGTC | pMK136 |
|                                |          |       | P-MK389                          | GTGCGGCCGCAAGCTTCGAATTCCTCCGCCAG   |        |
| pMK149 - SZ4-M3-TE             | Infusion | 149_V | digestion of pMK146 with HindIII |                                    |        |
|                                |          | 149_I | P-MK391                          | CGGATCCGGTAAGCTTGACCCGATCGCCATCGTC | pRSG34 |
|                                |          |       | P-MK389                          | GTGCGGCCGCAAGCTTCGAATTCCTCCGCCAG   |        |
| pMK150 - (5)M1-SZ3             | Infusion | 150_V | P-MK394                          | ACGACCGCGACCGGTTTC                 | pMK111 |
|                                |          |       | P-MK389                          | GTGCGGCCGCAAGCTTCGAATTCCTCCGCCAG   |        |
|                                |          | 150_I | P-MK392                          | GAACCGGTCGCGGTCGT                  | pBL13  |
|                                |          |       | P-MK393                          | GCCGAGTTCGGCGGCC                   |        |
| pMK152 - SZ4-KR1-ACP1-M3-TE    | Infusion | 152_V | P-MK478                          | GATGGCGATCGGGTCATCGACGGGGGCCGTGG   | pMK142 |
|                                |          |       | P-MK153                          | AGCGGGACTCCCGCCC                   |        |
|                                |          | 152_I | P-MK398                          | GACCCGATCGCCATCGTC                 | pRSG34 |
|                                |          |       | P-MK399                          | GTCGAGCTGACTAGTGTGCTG              |        |
| pMK168 - SZ4-KR5-ACP5(2)       | Infusion | 168_V | P-MK402                          | GACGAGCCGCTCCAGGTA                 | pMK137 |
|                                |          |       | P-MK291                          | TCGAGCTCCGTCGACAAGCT               |        |
|                                |          | 168_I | P-MK457                          | CTGGAGCGGCTCGTCGGCACCGAGGTCCGGG    | pMK112 |
|                                |          |       | P-MK458                          | GTCGACGGAGCTCGAATTCGGATCGCCGTCGAGC |        |
| pMK169 - SZ4-RIFS(KR1-ACP1)(2) | Infusion | 169_V | P-MK459                          | GAAGAGCTTGCGCGCAG                  | pMK138 |
|                                |          |       | P-MK291                          | TCGAGCTCCGTCGACAAGCT               |        |
|                                |          | 169_I | P-MK460                          | CGCGCCAAGCTCTTCGGCACCGAGGTCCGGG    | pMK112 |
|                                |          |       | P-MK458                          | GTCGACGGAGCTCGAATTCGGATCGCCGTCGAGC |        |
| pMK170 - SZ4-M5-TE             | Infusion | 170_V | digestion of pMK146 with HindIII |                                    |        |
|                                |          | 170_I | P-MK390                          | CGGATCCGGTAAGCTTGAGCCGATCGCGATCGTC | pBL17  |
|                                |          |       | P-MK389                          | GTGCGGCCGCAAGCTTCGAATTCCTCCGCCAG   |        |

References for plasmids constructed elsewhere: pCK7<sup>7</sup>; pBP130<sup>8</sup>; pAYC59<sup>9</sup>; pAJ20 and pAJ21<sup>10</sup>; pBL13, pBL16, pBL17, and pBL18<sup>11</sup>; pRSG34<sup>12</sup>; pFRSZ was a gift from Mislav Oreb, Goethe University Frankfurt. In addition pBL12 was used to produce LDD(4)<sup>11</sup>.

**Table S2: Amino acid sequences of proteins used in this study.** If no indication is given the PKS domain/modules are derived from DEBS. SZ domains are shown in red, docking domains in green, and linker regions in gray. L<sub>12</sub> is the ACP1-KS2 linker used to covalently fuse ACP1 to a heterologous acceptor module.

| Construct                  | Amino acid sequence                                                                                                                                                                                                                                                                                                                                                                                                                                                                                                                                                                                                                                                                                                                                                                                                                                                                                                                                                                                                                                             |
|----------------------------|-----------------------------------------------------------------------------------------------------------------------------------------------------------------------------------------------------------------------------------------------------------------------------------------------------------------------------------------------------------------------------------------------------------------------------------------------------------------------------------------------------------------------------------------------------------------------------------------------------------------------------------------------------------------------------------------------------------------------------------------------------------------------------------------------------------------------------------------------------------------------------------------------------------------------------------------------------------------------------------------------------------------------------------------------------------------|
| MK96<br>KR1-ACP1-(2)       | MDEVSAALRYRIEWRPTGAGEPARLDGTWLVAKYAGTADETSTAAREALESAGARVRELVVDARCGRDELAERLRSVGEV<br>AGVLSLLAVDEAEPEEAPLALASLADTSLVQAMVSAELGCPLWVTESAVATGPFERVRNAAHGALWGVGRVIALENPA<br>VWGGGLVDVPAGSVAELARHLAAVVSSGGAGEDQLALRADGVYGRRWVRAAAPATDDEWKPTGTVLVTGGTGGVGGQIA<br>RWLARRGAPHLLLVSRSRGPADGAGELVAELEALGARTTVAACDVTDRESVRELLGGIGDDVPLSAVFHAAATLDDGTVD<br>TLTGERIERASRAKVLGARNLHELDTRELDLTAFLVLFSSFASAFGAPGLGGYAPGNAYLDGLAQRRSDGLPATAVAWGTW<br>AGSGMAEGPVADRFRRHGVIEMPPETACRALQNALDRAEVCPIVIDVRWDRFLAYTAQRPTLRFDEIDDARRAAPQAAAE<br>PRVGALASLPAPEREKALFELVRSHAAAVLGHASAERVPADQAFELGVDLSALELRNRLGAATGVRLPTTTVFDHPDVR<br>TLAAHLAAELGTEVRGEAPSALAGLDALEAALPEVPATEREELVQRLERMLAALRPVAQAADASGTGANPSGDDLGEAGV<br>DELLEALGRELDGDPNSSSSVDKLAALAEHHHHHH*                                                                                                                                                                                                                                                                                                                               |
| MK111<br>(5)KS1-AT1-L-SZ3  | MSGDNGMTEEKLRRYLKRTVTELDSTARLREVEHHRAGEPVAVVAMACRLPGGVSTPEEFWELLSEGRDAVAGLPTDRG<br>WDLDSLPHDPTRSGTAHQGGGFLTEATAFDPAFFGMSPREALAVDPQQRLMLELSWEVLERAGIPPTSLQASPTGVFVGL<br>IPQEYGPRLAEGGEGVEGYLMTGTTTTSVASGRIAYTLGLEGPAISVDTACSSSLVAVHLACQSLRRGESSLAMAGGVTVMPT<br>PGMLVDFSRMNSLAPDGRCKAFSAGANGFGMAEGAGMLLLERLSDARRNGHPVLA VLRGTA VNSDGASNGLSAPNGRAQ<br>VRVIQALAESGLGPADIDAVEAHGTGTRLDGPPEARLFEAYGRDREQPLHLGSVKSNLGHQTQAAAGVAGVIKVMPLAMR<br>AGTLPRTLHASERSKEIDWSSGAISLLDEPEPWAGARPRRAGVSSFGISGTNAHAIIEEAPQVVEGERVEAGDVPLVLSA<br>SSAEGLRQAARLAAHLREHPGQDPRDIAYSLTAGRAALPHRAAFAPVDESAALRVLDGLATGNADGAAVGTSTRAQQRVAV<br>FVFPQQGWQWAGMAVDLLDTSVPVFAAALRECADALEPHLDFEVIPFLRAEAARREQDAALSTERVDVVQVPMFAVMVSL<br>ASMWRAHGVPEAAVIGHSQGEIAAACVAGALSDDAARVVALRSRVIATMPGNKGMASIAAPAGEVRARIGDRVEIAAVN<br>GPRSVVVAGDSDELDRLVASCTTECIRAKRLAVDYASHSSHVETIRDALHAELGEDFHPLPGFVPPFFSTVTGRWTQPDELDA<br>GYWYRNLRRTVRFADAVRALAEQGYRTFLEVSAPHILTAIEIEIGDGGSGADLSAIHSLRRGDGSLADFGAALSRAFAAGVA<br>VDWESVHLGTGARRVPLPTYPFQRERVWLGSGGGSGNEVTTLENDAAFIENENAYLEKEIARLRKEKAALRNRLAHKKL<br>EHHHHHH* |
| MK112<br>SZ4-L-KR1-ACP1(2) | MQKVAELKNRVAVKLNREQLKKNVEELKNRNAYLKNELATLENEVARLENDVAEGGSGGGSGDEVSALRYRIEWRPTG<br>AGEPARLDGTWLVAKYAGTADETSTAAREALESAGARVRELVVDARCGRDELAERLRSVGEVAGVLSLLAVDEAEPEEAP<br>LALASLADTSLVQAMVSAELGCPLWVTESAVATGPFERVRNAAHGALWGVGRVIALENPAVWGGGLVDVPAGSVAELA<br>RHLAAVVSSGGAGEDQLALRADGVYGRRWVRAAAPATDDEWKPTGTVLVTGGTGGVGGQIARWLARRGAPHLLLVSRSR<br>PDADGAGELVAELEALGARTTVAACDVTDRESVRELLGGIGDDVPLSAVFHAAATLDDGTVDTLTGERIERASRAKVLGA<br>RNLHELDTRELDLTAFLVLFSSFASAFGAPGLGGYAPGNAYLDGLAQRRSDGLPATAVAWGTWAGSGMAEGPVADRFRRH<br>GVIEMPPETACRALQNALDRAEVCPIVIDVRWDRFLAYTAQRPTLRFDEIDDARRAAPQAAAEPRVGALASLPAPEREKAL<br>FELVRSHAAAVLGHASAERVPADQAFELGVDLSALELRNRLGAATGVRLPTTTVFDHPDVRTLAAHLAAELGTEVRGE<br>APSALAGLDALEAALPEVPATEREELVQRLERMLAALRPVAQAADASGTGANPSGDDLGEAGVDELLEALGRELDGDPNS<br>SSVDKLAALAEHHHHHH*                                                                                                                                                                                                                                                                |
| MK113<br>(5)KS1-AT1        | MSGDNGMTEEKLRRYLKRTVTELDSTARLREVEHHRAGEPVAVVAMACRLPGGVSTPEEFWELLSEGRDAVAGLPTDRG<br>WDLDSLPHDPTRSGTAHQGGGFLTEATAFDPAFFGMSPREALAVDPQQRLMLELSWEVLERAGIPPTSLQASPTGVFVGL<br>IPQEYGPRLAEGGEGVEGYLMTGTTTTSVASGRIAYTLGLEGPAISVDTACSSSLVAVHLACQSLRRGESSLAMAGGVTVMPT<br>PGMLVDFSRMNSLAPDGRCKAFSAGANGFGMAEGAGMLLLERLSDARRNGHPVLA VLRGTA VNSDGASNGLSAPNGRAQ                                                                                                                                                                                                                                                                                                                                                                                                                                                                                                                                                                                                                                                                                                                 |

|                                                  |                                                                                                                                                                                                                                                                                                                                                                                                                                                                                                                                                                                                                                                                                                                                                                                                                                                                                                                                                                                                                                                                                                                                                                                                                                                                                                                                                                                                                                                                                                                                                                                                                                                                                                                                                                                                                                                                                                                                                                                                                                                                                                                                                                                                                                                                                                                                                                                                                                                                                                                                                                                                                                                                    |
|--------------------------------------------------|--------------------------------------------------------------------------------------------------------------------------------------------------------------------------------------------------------------------------------------------------------------------------------------------------------------------------------------------------------------------------------------------------------------------------------------------------------------------------------------------------------------------------------------------------------------------------------------------------------------------------------------------------------------------------------------------------------------------------------------------------------------------------------------------------------------------------------------------------------------------------------------------------------------------------------------------------------------------------------------------------------------------------------------------------------------------------------------------------------------------------------------------------------------------------------------------------------------------------------------------------------------------------------------------------------------------------------------------------------------------------------------------------------------------------------------------------------------------------------------------------------------------------------------------------------------------------------------------------------------------------------------------------------------------------------------------------------------------------------------------------------------------------------------------------------------------------------------------------------------------------------------------------------------------------------------------------------------------------------------------------------------------------------------------------------------------------------------------------------------------------------------------------------------------------------------------------------------------------------------------------------------------------------------------------------------------------------------------------------------------------------------------------------------------------------------------------------------------------------------------------------------------------------------------------------------------------------------------------------------------------------------------------------------------|
|                                                  | <p>VRVIQQALAESGLPADIDAVEAHGTGTRLGDPIEARALFEAYGRDREQPLHLGSKVSNLGHGTQAAAGVAGVIKMLAMR<br/> AGTLPRTLHASERSKEIDWSSGAISLLDEPEPWAGARPRRAGVSSFGISGTNAHAHIEEAPQVVEGERVEAGDVVAPWVLSA<br/> SSAEGRLAQAARLAAHLREHPGQDPRDIAYSLATGRAALPHRAAFAPVDESAALRVL DGLATGNADGAAVGTSTRQQRAV<br/> FVFPQGQWQWAGMAVDLLDTSPVFAAALRECADALEPHLDFEVIPFLRAEAARREQDAALSTERVDVVQPMFVAVMVS<br/> ASMWRAHGVPEAAVIGHSQGEIAAACVAGALSDDAARVVALRSRVIAATMPGNKGMASIAAPAGEVRRARIGDRVEIAAVN<br/> GPRS VVVAGDSDELDRLVASCTTECIRAKRLAVDYASHSSHVETIRDALHAELGEDFHPLPGFVPPFFSTVTGRWTQPELDA<br/> GYWYRNLRRTVRFADAVRALAEQGYRTFLEVSAPILTAHIEEIGDGGADLSAIHSLRRGDGSLADFGAALSRAFAAGVA<br/> VDWESVHLGTGARRVPLPTYPFQRERVWLEHHHHHHH*</p>                                                                                                                                                                                                                                                                                                                                                                                                                                                                                                                                                                                                                                                                                                                                                                                                                                                                                                                                                                                                                                                                                                                                                                                                                                                                                                                                                                                                                                                                                                                                                                                                                                                                                                                                                                                                                                                                                                                                                                                         |
| <p>MK136<br/> SZ4-L-KR1-ACPI-<br/> L12-M2-TE</p> | <p><b>MQKVAELKNRVAVKLNREQLKKNKVEELKNRNAYLKNELATLENEVARLENDVAE</b>GGSGGGSGDEVSAALRYRIEWRPTG<br/> AGEPARLDGTWLVAKYAGTADETSTAAREALESAGARVREL VVDARCGRDELAERLRSVGEVAGVLSLLAVDEAEPEEAP<br/> LALASLADTSLVQAMVSAELGCPLWTVTESAVATGPFERVRNAAHGALWGVGRVIALENPAVWGGLVDVPAGSVAELA<br/> RHLAAVVSGGAGEDQLALRADGVYGRRWVRAAPATDDEWKPTGTVLVTGGTGGVGGQIARWLARRGAPHLVSRSG<br/> PDADGAGELVAELEALGARTTVAACDVT DRESVRELLGGIGDDVPLSAVFHAAATLDDGTVDTLTGERIERASRAKVLGA<br/> RNLHEL TRELDLTAFVLFSSFASAFGAPGLGGYAPGNA YLDGLAQRRSDGLPATAVAWGTWAGSGMAEGPVADRFRRH<br/> GVIEMPPETACRALQNALDRAEVCPIVIDVRWDRFLLAYTAQRPTLDFEIDDARRAAPQAAAEPVGAHMLASLPAPERE<br/> KALFELVRSHAAAVLGHASAERVPADQAFaelGVDSLSALELRNRLGAATGVRLPTTTVFDHPDVRTLAAHLAAELGGAT<br/> GAEQAAPATTAPVDEPIAIVGMACRLPGEVDSPERLWELITSGRDSAAEVPDDRGRWVPDELMA SDAAGTRRAHGNFMAGA<br/> GDFDAAFFGISPREALAMDPQQRQALETTEWALESAGIPETLRGSDTGVFVGM SHQGYATGRPRPEDGVDTGNTAS<br/> VASGRIAYVLGLEPALTVDTACSSSLVALHTACGSLRDGDCGLAVAGVSVMAGPEVTFEFSRQGALSPDGRCKPFSDEA<br/> DGFLGEGSAFVVLQRLSDARREGRRVLGVVAGSAVNQDGASNGLSAPSGVAQQRVIRRAWARAGITGADVAVVEAHGT<br/> GTRLDGPVEASALLATYGKSRGSSGPVLLGSKVSNIGHAQAAAGVAGVIKVLGLERGVPPMLCRGERSGLIDWSSGEIEL<br/> ADGVREWSPAADGVRRAGVSAFGVSGTNAHVIIAEPPEPEPVQPRRMLPATGVVPPVLSARTGAALRAQAGRLADHLAA<br/> HPGIAPADVSWTMARARQHFEERAAVLAADTAEAVHRLRAVADGAVVPGVVTGSASDGGSVFVFPQGGAQWEGMAREL<br/> LPVPVFAESIAECDAVLSEVAGFSVSEVLEPRPDAPSLERVDVVQPVLFVAVMVS LARLWRACGAVPSAVIGHSQGEIAAAV<br/> AGALSLEDGMRVVARRSRAVRAVAGRGSMLSVRGGRSDVEKLLADDSWTGRLEVA AVNGPDAVVVAGDAQAAREFLEY<br/> CEGVGIRARAIPVDYASHTAHVEPVRDELVQALAGITPRRAEVPFFSTLTGDFLDGTELDAGYWYRNLRHPVEFHSAVQAL<br/> TDQGYATFIEVSPHPVLASSVQETLDDAESDAAVLGTLERDAGDADRFLTALADAHTRGVAVDWEAVLGRAGLVDLPGYP<br/> FQGRFWLLPDRTPRDEL DGFYRVDWTEVPRSEPAALRGRWLVVVEGHEEDGWTVEVRSALAEAGAEPEVTRGVGG<br/> LVGDCAGVVSLLALEGDGAVQTLVLRVREDAEGIDAPLWTVTFGAVDAGSPVARPDQAKLWGLGQVASLERGPRWTGLV<br/> DLPHMPDPPELRGRLTAVLAGSEDQAVRADAVRARRLSPAHTATSEYAVPGGTILVTGGTAGLGAELVARWLAGRGAEH<br/> LALVSRGPDTEGVGDLTAE LTRLGARVSVHACDVSSREPVELVHGLIEQGDVVRGVVHAAGLPQQVAINDMDEAAFDE<br/> VVAAKAGGAVHLDELCSDAELFLLFSSGAGVWGSARQGAYAAGNAFLDAFARHRRGRGLPATSVAWGLWAAGGMTGD<br/> EEAVSFLRERGV RAMPVPRALAALDRVLASGETAVVVTDDVWPFAESYTAARPRPLLDRIVTTAPSERAGEPETESLRDR<br/> LAGLPRAERTAELVRLVRTSTATV LGHDDPKAVRATTPFKELGFDSLAAVRLRNLLNAATGLRLPSTLVFDHPNASAVAGF<br/> LTSELGSGTPAREASSALRDGYRQAGVSGRVRSYLDLLAGLSDFREHFHDGSDGFSLDL VDMADGPGEVTVICCACTAAISGP<br/> HEFTRLAGALRGIAPVRAVPQPGYEEGEPLSSMAAAVA AVQADAVIRTQGD KPFVAVAGHSAGALMAYALATELLDRGHPP<br/> RGVV LIDVYPPGHQDAMNAWLEELTATLFDRETVRMDDTRLTALGAYDRLTGQWRPRETGLPTLLVSAGEPMPGPWPDSS<br/> WKPTWPF EHDTVAVPGDHFTMVQEHADAIARHIDAWLGGGNSSSVDKLA AALEHHHHHHH*</p> |
| <p>MK137<br/> SZ4-L-KR5-ACP5-</p>                | <p><b>MQKVAELKNRVAVKLNREQLKKNKVEELKNRNAYLKNELATLENEVARLENDVAE</b>GGSGGGSGPIPTGGRARDEDDDW<br/> RYQVVWREAEWESASLAGRVLLVTGPGVPSSELSDAIRSGLEQSGATVLTCDVESRSTIGTALEAADTDALSTVVSLSRDGE</p>                                                                                                                                                                                                                                                                                                                                                                                                                                                                                                                                                                                                                                                                                                                                                                                                                                                                                                                                                                                                                                                                                                                                                                                                                                                                                                                                                                                                                                                                                                                                                                                                                                                                                                                                                                                                                                                                                                                                                                                                                                                                                                                                                                                                                                                                                                                                                                                                                                                                               |

|                                                                    |                                                                                                                                                                                                                                                                                                                                                                                                                                                                                                                                                                                                                                                                                                                                                                                                                                                                                                                                                                                                                                                                                                                                                                                                                                                                                                                                                                                                                                                                                                                                                                                                                                                                                                                                                                                                                                                                                                                                                                                                                                                                                                                                                                                                                                                                                                                                                                                                                                                                                                                                             |
|--------------------------------------------------------------------|---------------------------------------------------------------------------------------------------------------------------------------------------------------------------------------------------------------------------------------------------------------------------------------------------------------------------------------------------------------------------------------------------------------------------------------------------------------------------------------------------------------------------------------------------------------------------------------------------------------------------------------------------------------------------------------------------------------------------------------------------------------------------------------------------------------------------------------------------------------------------------------------------------------------------------------------------------------------------------------------------------------------------------------------------------------------------------------------------------------------------------------------------------------------------------------------------------------------------------------------------------------------------------------------------------------------------------------------------------------------------------------------------------------------------------------------------------------------------------------------------------------------------------------------------------------------------------------------------------------------------------------------------------------------------------------------------------------------------------------------------------------------------------------------------------------------------------------------------------------------------------------------------------------------------------------------------------------------------------------------------------------------------------------------------------------------------------------------------------------------------------------------------------------------------------------------------------------------------------------------------------------------------------------------------------------------------------------------------------------------------------------------------------------------------------------------------------------------------------------------------------------------------------------------|
| M6-TE                                                              | <p>AVDPSLDALALVQALGAAGVEAPLWVLTRNAVQVADGELVDPAQAMVGGLGRVVGIEQPGRWGGLVDLVDADAASIRS<br/>     LAAVLADPRGEEQVAIRADGIKVARLVPAPARAARTRWSRGTVLTGGTGGIGAHVARWLARSGAEHLVLLGRRGADAP<br/>     GASELREELTALGTGVTIAACDVADRARLEAVLAAERAEGRTVSVMHAAGVSTSTPLDDLTEAEFTEIADVVKVRGTVNL<br/>     ELCPLDADFVLFSSNAGVWVWSPGLASYAAANAFLDGFAARRRSEGAAPVTSIAWGLWAGQNMAGDEGGEYLRSQLRAMD<br/>     PDRAVEELHITLDHGQTSVSVVMDRRRFVELFTAARHRPLFDEIAGARAEARQSEEGPALAQRLAALSTAERREHLAHLIR<br/>     AEVA AVLGHGDDAAIDRDRAFRDLGFDSTAVDLRNRLAAVTGVREAATVVFDHPTITRLADHYLERLVGAAEAEQAPA<br/>     LVREVPKDADDPIAIVGMACRFPGGVHNPGELWEFIVGGGDAVTEMPTRDGRWDLDFDPDPQRHGTSYSRHGAFLDGAA<br/>     DFDAAFFGISPREALAMDPQQRQVLETTWELFENAGIDPHSLRGSSTGVFLGAAVYQGYGQDAVVPEDSEGILLTGNSAVV<br/>     SGRVAVVGLGEPVAVTVDACSSSLVALHSACGLRDGDCGLAVAGGVSVVMAGPEVFTFSRQGGGLAVDGRCKAFSAEAD<br/>     GFGFAEGVAVVLLQRLSDARRAGRQVLGVVAGSAINQDASNGLAAPSGVAQQRVIRKAWARAGITGADVAVVEAHGTG<br/>     TRLGDPVEASALLATYGKSRGSSGPVLLGSVKSNIHQAAGVAGVIKVVLLGLNRGLVPPMLCRGERSPLIEWSSGGVEL<br/>     AEAVSPWPPAADGVRRAGVSAFGVSGTNAHVIIAEPPEPEPLPEPGPVGLAAANSVPVLLSARTETALAAQARLLESVDD<br/>     SVPLTALASALATGRAHLPRRAALLAGDHEQLRGLRAVAEGVAAPGATTGTASAGGVVVFVPGQGAQWEGMARGLLSV<br/>     PVFAESIAECDAVLSEVAGFSASEVLEQRPDAPSLERVDVVQPVLFSVMVSLARLWGACGVSPSAVIGHSQGEIAAAVVAG<br/>     VLSLEDGVRVVALRAKALRALAGKGGMVSLAAPGERARALIAPWEDRISVAAVNSPSSVVVSGDPEALAEVVARCEDEGV<br/>     RAKTLPVDYASHSRHVEEIRETILADLDGISARRAAIPLYSTLHGERRDGMGPVRYWYDNLRSQVRFDEAVSAAVADGHA<br/>     TFVEMSPHPVLTAAVQEIAADAVAIGSLHRDTAEHLIAELARAHVHGVAVDWRNVFPAAPPVALPNYPFEPQRYWLAVEV<br/>     SDQLADSRVVDWRPLATTPVDLEGGFLVHGSAPESLTSAVEKAGGRVVPVASADREALAAALREVPGEVAGVLSVHTGA<br/>     ATHLALHQLGEGAVRPLWLVTSTRAVALGESEVPEQAMVWGLGRVMGLETPERWGGLVDLPAEPAPGDGEAFVACL<br/>     GADGHEDQVAIRDHARYGRRVLRAPLGTRESSWEPAGTALVTGGTALGGHVARHLARCGVEDLVLVSRRGVDPAGAAE<br/>     LEAELVALGAKTTITACDVADREQLSKLLEELRGQRPVVRTVVHTAGVPESRPLHEIGELESVCAAKVTGARLLDELCPDAE<br/>     TFVLFSSGAGVWGSANLGAYSAANAYLDALAHRRRAEGRAATSVAWGAWAGEGMATGDLEGLTRRGLRPMAPERAIRA<br/>     LHQALDNGDTCVSIADVDERFAVGFTAARPRLLDELVTPAVGAVPAVQAAPAREMTSQELLEFTSHVAAILGHSSPDA<br/>     VGQDQPFTELGFDSLTAVGLRNQLQATGLALPATLVFEHPTVRRADHIGQQLDSGTPAREASSALRDGYRQAGVSGRVR<br/>     SYDLLAGLSDFREHFDGSDGFSLDLVDMDGPGVETVICCAGTAAISGPHEFTRLAGALRGIAPVRAVPQPGYEEGEPLSS<br/>     MAVA AVQADAVIRTQGDKPFVAGHSAGALMAYALATELLDRGHPPRGVVLIDVYPPGHQDAMNAWLEELTATLFDRE<br/>     TVRMDDTRLTALGAYDRLTGQWRPRETGLPTLLVSAGEPMGPWPPDSWKPTWPFHDTVAVPGDHFTMVQEHADAIARH<br/>     IDAWLGGGNSSSVDKLAAALEHHHHHHH*</p> |
| <p>MK138<br/> <b>SZ4-L-RIFS (KR1-<br/>         ACP1-M2)-TE</b></p> | <p><b>MQKVAELKNRVAVKLNREQLKNKVEELKNRNAYLKNELATLENEVARLENDVAE</b>GGSGGGSGEPAEPASAGDPLLGTV<br/>     VSTPGSDRLTAVAQWSRRAQPWAVDGLVPNAALVEAAIRLGDLAGTPVVGELVVDAPVVLPRRGSREVQLIVGEPGEQRR<br/>     RPIEVFSREADEPWTRHAHGTLPAAAAVPEPAAAGDATDVTVAGLRDADRYGIHPALLDAAVRTVVGDDLPSVWTGVS<br/>     LLASGATAVTVTPTATGLRLTDPAGQPVLTVESVRGTPFVAEQGTTDALFRVDWPEIPLTAETADFLPYEATSAEATLSAL<br/>     QAWLADPAETRLAVVTGDCTEPGAAIWLVRSAQSEHPGRIVLADLDDPAVLPVAVASGEPQVRVRNGVASVPRLTRVT<br/>     PRQDARPLDPEGTVLITGGTGLGALTARHLVTAHGVRHLVLSRRGEAPELQEELTALGASVAIAACDVADRAQLEAVLR<br/>     AIPAEHPLTAVIHTAGVLDGDDGVVTELPDRLATVRRPKVDAARLLDEL TREADLAAFVLFSSAAGVLGNPGQAGYAAANAE<br/>     LDALARQRNSLDLPAVSIWGYWATVSGMTEHLGDADLRRNQIRIGMSGLPADEGMALLDAAIATGGTLVAAKFDVAALR<br/>     ATAKAGGPVPLLRLGLAPLPRRAAAKTASLTERLAGLAETEQAALLDLVRRHAAEVLGHSGAESVHSGRTFKDAGFDSL<br/>     AVELRNRLAAATGLTSPAMIFDYPKPPALADHLRAKLFGSAANRPAEIGTAAAEPIAIVAMACRFPGGVHSPEDLWRLVA<br/>     DGADAVTEFPADRGWDTDRLYHEDPDHEGTTYVRHGAFLLDAAAGFDAAFFGISPNEALAMDPQQRLLLETSWELFERAAI<br/>     DPTTLAQDIGVFAGVNSHDYSMRMHRAAGVEGFRLTGGSSASVLSGRVAYHFGVEGPAVTVDTACSSSLVALHMAVQAL</p>                                                                                                                                                                                                                                                                                                                                                                                                                                                                                                                                                                                                                                                                                                                                                                                                                                                                                                                                                                                                                                                                                                                                                                                                                                                                                                                                                                                                                     |

|                                                  |                                                                                                                                                                                                                                                                                                                                                                                                                                                                                                                                                                                                                                                                                                                                                                                                                                                                                                                                                                                                                                                                                                                                                                                                                                                                                                                                                                                                                                                                                                                                                                                                                                                                                                                                                                                                                                                                                                                                                                                                                                                                                                                                                                                                                                                                                                                                       |
|--------------------------------------------------|---------------------------------------------------------------------------------------------------------------------------------------------------------------------------------------------------------------------------------------------------------------------------------------------------------------------------------------------------------------------------------------------------------------------------------------------------------------------------------------------------------------------------------------------------------------------------------------------------------------------------------------------------------------------------------------------------------------------------------------------------------------------------------------------------------------------------------------------------------------------------------------------------------------------------------------------------------------------------------------------------------------------------------------------------------------------------------------------------------------------------------------------------------------------------------------------------------------------------------------------------------------------------------------------------------------------------------------------------------------------------------------------------------------------------------------------------------------------------------------------------------------------------------------------------------------------------------------------------------------------------------------------------------------------------------------------------------------------------------------------------------------------------------------------------------------------------------------------------------------------------------------------------------------------------------------------------------------------------------------------------------------------------------------------------------------------------------------------------------------------------------------------------------------------------------------------------------------------------------------------------------------------------------------------------------------------------------------|
|                                                  | <p>QRGECMALAGGVMVMTVETVFEFSRQRGLAPDGRCKAFADGADGTGWSEGVGLLLVERLSEAQRRGHQVLA VVRGS<br/> AVNSDGASNGLTAPNGPSQQRVIRKALAAAGLSTSDVDAVEAHGTGTTLDGPIEAEALLATYQGNRETPLWLGSVKSNLG<br/> HTQAAAGVAGVIKVMAMRHGVLPRTLHVDRPSSYVDWSAGAVELLTEARDWVSNGHPRRAGVSSFGIGGTNAHVLE<br/> EVAAPITTPQPEAEFLVPVLSARTAAGLRGQAGRLAAFLGDRTDVRVPDAAYALATTRAQLDHRAVVLASDRAQLCAD<br/> LAAFSGSVVTGTPVDGKLAVLFTGQGSQWAGMGRELAETFPVFRDAFEAAACEAVDTHLRERPLREVVFDDSDALLDQTMYT<br/> QGALFAVETALFRLFESWGVPRGLLAGHSIGELAAHVSGVLDLADAGELVAARGRLMQALPAGGAMVA VQATEDEVAP<br/> LLDGTVCVAAVNGPDSVVLSGTEAAVLAVADELAGRGRKTRRLAVSHAFHSPLMEPMLDDFRAVAERLTYRAGSLPVVST<br/> LTGELAALDSPDYWVGQVRNAVRFSDAVTALGAQGASTFLELGPGGALAAALGTLGGPEQSCVATLRKNGAEVDPVLT<br/> ALAEHVVRGVGVDTTTLVDEPATAVGTVLPTYAFQHQRFWVDVDETA AVSVTPPPAEPIVDRPVQDVLELVRESAAVVLG<br/> HRDAGSFDLDRSFKDHGFDSL SAVKLRNRLRDFTGVELPSTLIFDYPNPAVLADHLRAELLSGTPAREASSALRDGYRQAGV<br/> SGRVRSYLDLLAGLSDFREHFDFGSDGFSLDLVD MADGPGEVTVICCAGTAAISGPHEFTRLAGALRGIAPVRAVPQPGYEEG<br/> EPLPSSMAAVAAVQADAVIRTQGDKPFVVAGHSAGALMAYALATELLDRGHPPRGVVLIDVYPPGHQDAMNAWLEELTA<br/> TLFDRETVRMDDTRLTALGAYDRLTGQWRPRETLPLTLLVSAGPEMGPWPDDSWKPTWPFHEHTVA VPGDHFTMVQEHA<br/> DAIARHIDAWLGGGNSSSVDKLA AALEHHHHHHH*</p>                                                                                                                                                                                                                                                                                                                                                                                                                                                                                                                                                                                                                                                                                                                                                                                                                                                                                                                                                                                                                                                                                                                                |
| <p>MK141<br/> SZ4-L-KR1-ACPI-<br/> L12-M5-TE</p> | <p><b>MQKVAELKNRVAVKLNREQLKKNVEELKNRNAYLKNELATLENEVARLENDVAE</b>GGSGGGSGDEVSALRYRIEWRPTG<br/> AGEPARLDGTWLVAKYAGTADETSTAAREALESAGARVREL VVDARCGRDELAERLRSVGEVAGVLSLLAVDEAEPEEAP<br/> LALASLADTL SLVQAMVSAELGCPLWTVTESAVATGPFERVRNAAHGALWGVRVIALENPAVWGGLVDVPAGSVAELA<br/> RHAAVVS GGAGEDQLALRADGVYGRWRVRAAAPATDDEWKPTGTVLVTGGTGGVGGQIARWLARRGAPHLLLVSRS<br/> PDADGAGELVAEALGARTTVAACDVTDRESVRELLGGIGDDVPLSAVFHAAATLDDGTVDTLTGERIERASRAKVLGA<br/> RNLHEL TRELDLTAFLVLFSSFASAFGAPGLGGYAPGNAYLDGLAQRRSDGLPATAVAWGTWAGSGMAEGPVADRFRRH<br/> GVIEMPPETACRALQNALDRAEVCPIVIDVRWDRFLLAYTAQRPTRLFDEIDDARRAAPQAAAEPVGAHMLASLPAPERE<br/> KALFELVRSHAAAVLGHASAERVPADQAFaelGVDSLSALELRNRLGAATGVRLPTTTVFDHPDVRTLAAHLAAELGGAT<br/> <b>GAEQAAPATTAPVDEPIAIVGMACRFPGDVDSPEFWEFVSGGDAIAEAPADRGWEPDPDARLGGMLAAAGDFDAGFFGI</b><br/> SPREALAMPQQRIMLEISWEALERAGHDPVSLRGSATGVFTGVGTVDYGPRPDEAPDEV LGYVGTGTASSVASGRVAYCL<br/> GLEGPAMTVDTACSSGLTALHLAMESLRRDECGLALAGGVTVMSSPGAFTEFRSQGGLAADGRCKPFSKAADGFGLAEGA<br/> GVLVLQRLSAARREGRPVLA VLRGS AVNQDGASNGLTAPSGPAQQRVIRRALENAGVRAGVDYVEAHGTGTRLGDPIEV<br/> HALLSTYGAERDPDDPLWIGSVKSNIGHTQAAAGVAGVMKAVLALRHGEMPRTLHFDEPSPQIEWDLGAVSVVSQARSWP<br/> AGERPRRAGVSSFGISGTNAHVIVEEAPEADEPEPAPDSGPVPLVLSGRDEQAMRAQAGRLADHLAREPRNSLRDTGFTLAT<br/> RRSAWEHRAVVVGDRDDALAGLRAVADGRIADRTATGQARTRRGVAMVFPGQGAQWQGMARDLLRESQVFADSIRDCE<br/> RALAPHVDWSLTDLLSGARPLDRVDVVQPALFAMVSLAALWRSHGVPEAAVVGHSQGEIAAAHVAGALTLEDAAKLVA<br/> VRSRVLRLGGQGMASFGLGTEQAERIGRFAGALSIVNGPRS VVVAGESGPLDELIAECEAEGITARRIPVDYASHSPQ<br/> VESLREELLTELAGISPVADVALYSTTTGQPIDTATMDTAYWYANLREQVRFQDATRQLAEAGFD AFVEVSPHPVLTVGIE<br/> ATLDSALPADAGACVVGTLRRDRGGLADFHTALGEAYAQGV EVDWSPAFADARPVELPVYPFQRQRYWLPIPTGGRARDE<br/> DDDWRVYQVWREAEWESASLAGRVLLVTGPGVPSELSDAIRSGLEQSGATVLTCDVESRSTIGTALEAADTDALSTVVSL<br/> SRDGEAVDPSLDALALVQALGAAGVEAPLWVLRNAVQVADGELVDP AQAMVGGGLGRVVGIEQPGRWGGVLDLVDADA<br/> ASIRSLAAVLADPRGEEQVAIRADGIKVARLVPAPARAARTRWSPRGTVLVTGGTGGIGAHVARWLARSGAEHLVLLGRR<br/> GADAPGASELREELTALGTGV TIAACDVADRARLEAVLAAERAEGRTVSAMMHAAGVSTSTPLDDLTEAEFTIADV KVRG<br/> TVNLDELCPDLDAFVLFSSNAGVWSPGLASYAANAFLDGFARRRRSE GAPVTSIAWGLWAGQNMAGDEGGEYLR SQ<br/> LRAMPDRAVEELHITLDHGQTSVSVVMDRRRFVELFTAARHRPLFDEIAGARAEARQSEEGPALAQR LAALSTAERREH<br/> LAHLIRAEVAAVLGHGDDAAIDRDRAFRDLGFDSMTAVDLRNRLAAVTGVREAA TVVFDHPTITRLADHYLERLVSGTPA</p> |

|                                       |                                                                                                                                                                                                                                                                                                                                                                                                                                                                                                                                                                                                                                                                                                                                                                                                                                                                                                                                                                                                                                                                                                                                                                                                                                                                                                                                                                                                                                                                                                                                                                                                                                                                                                                                                                                                                                                                                                                                                                                                                                                                                                                                                                                                                                                                                                                                                                                                                                                                                                                                                        |
|---------------------------------------|--------------------------------------------------------------------------------------------------------------------------------------------------------------------------------------------------------------------------------------------------------------------------------------------------------------------------------------------------------------------------------------------------------------------------------------------------------------------------------------------------------------------------------------------------------------------------------------------------------------------------------------------------------------------------------------------------------------------------------------------------------------------------------------------------------------------------------------------------------------------------------------------------------------------------------------------------------------------------------------------------------------------------------------------------------------------------------------------------------------------------------------------------------------------------------------------------------------------------------------------------------------------------------------------------------------------------------------------------------------------------------------------------------------------------------------------------------------------------------------------------------------------------------------------------------------------------------------------------------------------------------------------------------------------------------------------------------------------------------------------------------------------------------------------------------------------------------------------------------------------------------------------------------------------------------------------------------------------------------------------------------------------------------------------------------------------------------------------------------------------------------------------------------------------------------------------------------------------------------------------------------------------------------------------------------------------------------------------------------------------------------------------------------------------------------------------------------------------------------------------------------------------------------------------------------|
|                                       | REASSALRDGYRQAGVSGRVRSYDLLAGLSDFREHFDGSDGFSLDLVDMDADGPGEVTVICCAAGTAAISGPHEFTRLAGAL<br>RGIAPVRAVPQPGYEEGEPLPSSMAAVAAVQADAVIRTQGDKPFVAVAGHSAGALMAYALATELLDRGHPPRGVVLIDVYP<br>PGHQDAMNAWLEELTATLFDRETVRMDDTRLTALGAYDRLTGQWRPRETGLPTLLVSAGEPMGPWPDDSWKPTWPFHEH<br>TVAVPGDHFTMVQEHADAIARHIDAWLGGGNSSSVDKLAAALEHHHHHH*                                                                                                                                                                                                                                                                                                                                                                                                                                                                                                                                                                                                                                                                                                                                                                                                                                                                                                                                                                                                                                                                                                                                                                                                                                                                                                                                                                                                                                                                                                                                                                                                                                                                                                                                                                                                                                                                                                                                                                                                                                                                                                                                                                                                                                       |
| MK142<br>SZ4-L-KR1-ACPI-<br>L12-M6-TE | MQKVAELKNRVAVKLNREQLKKNVEELKNRNAYLKNELATLENEVARLENDVAEGGSGGGSGDEVSALRYRIEWRPTG<br>AGEPARLDGTWLVAKYAGTADETSTAAREALESAGARVRELVVDARCGRDELAERLRSVGEVAGVLSLLAVDEAEPEEAP<br>LALASLADTSLVQAMVSAELGCPLWTVTESAVATGPFERVRNAAHGALWGVGRVIALENPAVWGGLVDVPAGSVAELA<br>RHLAAVVS GGAGEDQLALRADGVYGRWRVRAAPATDDEWKPTGTVLVTGGTGGVGGQIARWLARRGAPHLLLVSRS<br>PDADGAGELVAELEALGARTTVAACDVTDRESVRELLGGIGDDVPLSAVFHAAATLDDGTVDTLTGERIERASRAKVLGA<br>RNLHEL TRELDLTAFLVLFSSFASAFGAPGLGGYAPGNAYLDGLAQRRSDGLPATAVAWGTWAGSGMAEGPVADRFRH<br>GVIEMPPETACRALQNALDRAEVCPIVIDVRWDRFLAYTAQRPTLFDIIDDARRAAPQAAAEPVGAHMLASLPAPERE<br>KALFELVRSHAAAVLGHASAERPADQAFaelGVDSLaleLRNRLGAATGVRLPTTTVFDHPDVRTLAAHLAAELGGAT<br>GAEQAAPATTAPVDDPIAIVGMACRFPGGVHNPGELEWEIFVGGGDAVTEMPTDRGWLDLALFDPPQRHGTSYSRHGAFL<br>DGAADFDAAFFGISPREALAMDPQQRQVLETTWELFENAGIDPHSLRGS DTGVFLGAA YQGYGQDAVVPEDSEGYLLTGN<br>SSAVVSGRVAYVVLGLEGPAVTVDTACSSSLVALHSACGSLRDGDCGLAVAGGV SVMAGPEVFTEFSRQGLAVDGRCKAF<br>SAEADGFGFAEGVAVVLLQRLSDARRAGRQVLGVVAGSAINQDGASNGLAAPSGVAQQRVIRKAWARAGITGADVAVVE<br>AHGTGTRLDGPVEASALLATYGKSRGSSGPVLLGSVKSNIHQAAAGVAGVIKVV LGLNRGLVPPMLCRGERSPLIEWSS<br>GGVELAEAVSPWPPAADGVRRAGVSAFGVSGTNAHVIIAEPPEPEPEPPEPGLAAANSVPVLLSARTETALAAQARLLE<br>SAVDDSVPLTALASALATGRAHLPRRAALLAGDHEQLRGLRAVAEGVAAPGATTGTASAGGVVVFVFPQGAQWEGMAR<br>GLLSVPVFAESIAECDAVLSEVAGFSASEVLEQRPDAPSLERVDVVPVLFVSVMSLARLWGACGVSPSAVIGHSQGEIAAA<br>VVAGVLSLEDGVRVVALRAKALRALAGKGMVSLAAPGERARALIAPWEDRISVAAVNSPSSVVVSGDPEALAEVARCE<br>DEGVRAKTLPVYASHSRHV EIRETILADLDGISARRAAIPLYSTLHGERRDGADMGPVRYWYDNLRSQVRFDEAVSAAVA<br>DGHATFVEMSPHPVLTAAVQEIADAVAIGSLHRDTAEELHIAELARAHVHGVAVDWRNVFPAAPPVALPNYPFEPQRYW<br>LAPEVSDQLADSRVVDWRPLATTPVDLEGGFLVHGSAPESLTSAVEKAGGRVVPVASADREALAAALREVPGEVAGVLS<br>VHTGAATHLALHQLSLGEAGVRAPLWLVTSTRAVALGESEPVDPQAMVWGLGRVMGLETPERWGGVLDLPAEPAPGDGE<br>AFVACL GADGHEDQVAIRDHARYGRRVLRAPLGTRESSWEPAGTALVTGGTGALGGHVARHLARCGVEDLVLSRRGVD<br>APGAAELEAELVALGAKTTITACDVADREQLSKLLEELRGQGRPVRTVVHTAGVPESRPLHEIGELESVCAAKVTGARLLD<br>ELCPDAETVLFSSGAGVWGSANLGAYSANAYLDALAHRRRAEGRAATSVAWGAWAGEGMATGDLEGLTRRGLRPM<br>PERAIRALHQALDNGDTCVSIADV DWERFVAGFTAARPRLLDELVTPAVGAVPAVQAAPAREMTSQUELLEFTHSHVAAIL<br>GHSSPDVAVGQDQPTELGFDSLTAVGLRNQLQATGLALPATLVFEHPTVRRADHIGQQQLDSGTPAREASSALRDGYRQA<br>GVSGRVRSYDLLAGLSDFREHFDGSDGFSLDLVDMDADGPGEVTVICCAAGTAAISGPHEFTRLAGALRGIAPVRAVPQPGY<br>EGEPLPSSMAAVAAVQADAVIRTQGDKPFVAVAGHSAGALMAYALATELLDRGHPPRGVVLIDVYPPGHQDAMNAWLEEL<br>TATLFDRETVRMDDTRLTALGAYDRLTGQWRPRETGLPTLLVSAGEPMGPWPDDSWKPTWPFHEHTVAVPGDHFTMVQE<br>HADAIARHIDAWLGGGNSSSVDKLAAALEHHHHHH* |
| MK147<br>SZ4-L-M6-TE                  | MQKVAELKNRVAVKLNREQLKKNVEELKNRNAYLKNELATLENEVARLENDVAEGGSGGGSGKLDPIAIVGMACRFPG<br>GVHNPGELEWEIFVGGGDAVTEMPTDRGWLDLALFDPPQRHGTSYSRHGAFLDGAADFDAAFFGISPREALAMDPQQRQV<br>LETTWELFENAGIDPHSLRGS DTGVFLGAA YQGYGQDAVVPEDSEGYLLTGNSSAVVSGRVAYVVLGLEGPAVTVDTACSS<br>LVALHSACGSLRDGDCGLAVAGGV SVMAGPEVFTEFSRQGLAVDGRCKAFSAEADGFGFAEGVAVVLLQRLSDARRAG<br>RQVLGVVAGSAINQDGASNGLAAPSGVAQQRVIRKAWARAGITGADVAVVEAHGTGTRLDGPVEASALLATYGKSRGSS<br>GPVLLGSVKSNIHQAAAGVAGVIKVV LGLNRGLVPPMLCRGERSPLIEWSSGGVELAEAVSPWPPAADGVRRAGVSAF                                                                                                                                                                                                                                                                                                                                                                                                                                                                                                                                                                                                                                                                                                                                                                                                                                                                                                                                                                                                                                                                                                                                                                                                                                                                                                                                                                                                                                                                                                                                                                                                                                                                                                                                                                                                                                                                                                                                                                                                                                     |



|                               |                                                                                                                                                                                                                                                                                                                                                                                                                                                                                                                                                                                                                                                                                                                                                                                                                                                                                                                                                                                                                                                                                                                                                                                                                                                                                                                                                                                                                                                                                                                                                                                                                                                                                                                                                                                                                                                                                                                                                                                                    |
|-------------------------------|----------------------------------------------------------------------------------------------------------------------------------------------------------------------------------------------------------------------------------------------------------------------------------------------------------------------------------------------------------------------------------------------------------------------------------------------------------------------------------------------------------------------------------------------------------------------------------------------------------------------------------------------------------------------------------------------------------------------------------------------------------------------------------------------------------------------------------------------------------------------------------------------------------------------------------------------------------------------------------------------------------------------------------------------------------------------------------------------------------------------------------------------------------------------------------------------------------------------------------------------------------------------------------------------------------------------------------------------------------------------------------------------------------------------------------------------------------------------------------------------------------------------------------------------------------------------------------------------------------------------------------------------------------------------------------------------------------------------------------------------------------------------------------------------------------------------------------------------------------------------------------------------------------------------------------------------------------------------------------------------------|
|                               | <p>GVSQTNAHVIIAEPPEPEPLPEPGPVGVLAANSVPVLLSARTETALAAQARLLESVDDSVPLTALASALATGRAHLPRRA<br/> ALLAGDHEQLRQQLRAVAEGVAAPGATTGTASAGGVVFPFGQGAQWEGMARGLLSVPVFAESIAECDAVLSEVAGFSAS<br/> EVLEQRPDAPSLERVDVVQPVLFSVMVSLARLWGACGVSPSAVIGHSQGEIAAAVVAGVLSLEDGVRVVALRAKALRALA<br/> GKGGMVSLAAPGERARALIAPWEDRISVA AVNSPSSVVVSGDPEALAEVVARCEDEGVRAKTLPVVYASHSRHVEEIRETIL<br/> ADLDGISARRAAIPLYSTLHGERRDGDADMGPVRYWYDNLRSQVRFDEAVSAAVADGHATFVEMSPHPVLTAAVQEIADA<br/> AIGSLHRDTAEHLIAELARAHVHGVAVDWRNVFPAAPPVALPNYPFEPQRYWLAPEVSDQLADSRYRVDWRPLATTPVD<br/> LEGGFLVHGSAPESLTSAVEKAGGRVVPVASADREALAAALREVPGEVAGVLSVHTGAATHLALHQSLEAGVRAPLWL<br/> TSRAVALGESEPVDPQAMVWGLGRVMGLETPERWGGGLVDLPAEPAPGDGEAFVACLADGHEDQVAIRDHARYGRRLV<br/> RAPLGTRESSWEPAGTALVTGGTGALGGHVARHLARCGVEDLVLSRRGVDAPGAAEAELEALVALGAKTTITACDVADRE<br/> QLSKLLEELRQGRPVRTVVHTAGVPESRPLHEIGELESVCAAKVTGARLLDELCPDAETVFLFSSGAGVWGSANLGAYSA<br/> ANAYLDALAHRRRAEGRATSVAWGAWAGEGMATGDLEGLTRRGLRPMAPERAIRALHQALDNGDTCVSIADVWERF<br/> AVGFTAARPRLLDELVTPAVGAVPAVQAAPAREMTSQUELLEFTHSHVAAILGHSSPDAVGQDQPFTELGFDSLTA<br/> VGLRNQLQATGLALPATLVFEHPTVRRADHIGQQLDSTPAREASSALRDGYRQAGVSGRVRSYLDLLAGLSDFREHFDGSDGF<br/> SLDLVDMADGPGEVTVICCAAGTAAISGPHEFTRLAGALRGIAPVRAVPQPGYEEGEPLPSSMAAVAAVQADAVIRTQGD<br/> KPFVVAGHSAGALMAYALATELLDRGHPPRGVVLIDVYPPGHQDAMNAWLEELTATLFDRETVRMDDTRLTALGAYDRLTG<br/> QWRPRETGLPTLLVSAGEPMGPWPDDSWKPTWPFHDTVA VPGDHFTMVQEHADAIARHIDAWLGGGNSKLAAALEHHH<br/> HHH*</p>                                                                                                                                                                                                                                                                                                                                                                                                                                                                                                                                                                |
| <p>MK148<br/> SZ4-L-M2-TE</p> | <p><b>MQKVAELKNRVAVKLNREQLKNKVEELKNRNAYLKNELATLENEVARLENDVAE</b>GGSGGGSGKLEPIAIVGMACRLPG<br/> EVDSPERLWELITSGRDSAAEVPDDRGWVPELMAASDAAGTRRAHGNFMAGAGDFDAFFGISPREALAMDPQORQALET<br/> TWEALESAGIPPETLRGSDTG VFGMSHQYATGRPRPEDGVDGYLLTGNTASVASGRIAYVLGLEGPAITVDTACSSSLV<br/> ALHTACGLRDGDCGLAVAGGVSMAGPEVTFESRQGALSPDGRCKPFSDEADGFGLEGSAFVVLQRLSDARREGRRV<br/> LGVVAGSAVNQDGASNGLSAPSGVAQQRVIRRAWARAGITGADVAVVEAHGTGTRLGDPVEASALLATYGKSRGSSGPV<br/> LLGSVKSNIHAQAAAGVAGVIKVLGLERGVVPPMLCRGERSGLIDWSSGEIELADGVREWSPAADGVRRAVSAFGVS<br/> GTNAHVIIAEPPEPEPVQPRRMLPATGVVPPVLSARTGAALRAQAGRLADHLAAHPGIAPADVSWTMARARQHFEERAA<br/> VLAADTAEAVHRLRAVADGAVVPGVVTGSASDGGSVFVFPFGQGAQWEGMARELLPVPVFAESIAECDAVLSEVAGFSVSE<br/> VLEPRPDAPSLERVDVVQVLFVAVMVSLARLWRACGAVPSAVIGHSQGEIAAAVVAGALSLEDGMRVVARRSRAVRAVA<br/> GRGSMLSVRGGRSVDEKLLADDSWTGRLEVA AVNGPDAVVVAGDAQAAREFLEYCEGVGIRARAIPVDYASHTAHVEPV<br/> RDELVQALAGITPRRAEVPFFSTLTGDFLDGTELDAGYWYRNLRHPVEFHSVAVQALTDQGYATFIEVSPHPVLASSVQETLD<br/> DAESDAAVLGTLERDAGDADRFLTALADAHTRGVAVDWEAVLGRAGLVDLPGYPFQGKRFWLLPDRTPRDELDTGWFYR<br/> VDWTEVPRSEPAALRGRWL VVVPEGHEEDGWTVEVRSALAEAGAEPEVTRGVGGLVGDCAGVVSLLALEGDGA VQTLVL<br/> VREDAEGIDAPLWTVTFGAVDAGSPVARPDQAKLWGLGQVASLERGPRWTGLVDLPHMPDPELRGRLTAVLAGSEDQV<br/> AVRADAVRARRLSPAHTATSEYAVPGGTILVTGGTAGLGAEVARWLAGRGAEHLALVSRGPDTEGVGDLTAELTRLGA<br/> RVSVHACDVSSREPVELVHGLIEQGDVVVRGVVHAAGLPQQVAINDMDEAAFDEVVAAKAGGAVHLDELCSDAELFLFS<br/> SGAGVWGSARQGAYAAGNAFLDAFARHRRRGLPATSVAWGLWAAGGMTGDEEAVSFLRERGVRAAMPVPRALALDR<br/> VLASGETAVVVTVDVWPAFAESYTAARPRLLDRIVTTAPSERAGEPETESLRDRLAGLPRAERTAELVRLVRTSTATVLGH<br/> DDPKAVRATTPFKELGFDSLAAVRLRNLLNAATGLRPLSTLVFDHPNASAVAGFLTSELGSGTPAREASSALRDGYRQAGV<br/> SGRVRSYLDLLAGLSDFREHFDGSDGFSLDLVDMADGPGEVTVICCAAGTAAISGPHEFTRLAGALRGIAPVRAVPQPGYEEG<br/> EPLPSSMAAVAAVQADAVIRTQGDKPFVVAGHSAGALMAYALATELLDRGHPPRGVVLIDVYPPGHQDAMNAWLEELT<br/> ATLFDRETVRMDDTRLTALGAYDRLTGQWRPRETGLPTLLVSAGEPMGPWPDDSWKPTWPFHDTVA VPGDHFTMVQEH<br/> ADAIARHIDAWLGGGNSKLAAALEHHHHHHH*</p> |

|                              |                                                                                                                                                                                                                                                                                                                                                                                                                                                                                                                                                                                                                                                                                                                                                                                                                                                                                                                                                                                                                                                                                                                                                                                                                                                                                                                                                                                                                                                                                                                                                                                                                                                                                                                                                                                                                                                                                                                                                                                                           |
|------------------------------|-----------------------------------------------------------------------------------------------------------------------------------------------------------------------------------------------------------------------------------------------------------------------------------------------------------------------------------------------------------------------------------------------------------------------------------------------------------------------------------------------------------------------------------------------------------------------------------------------------------------------------------------------------------------------------------------------------------------------------------------------------------------------------------------------------------------------------------------------------------------------------------------------------------------------------------------------------------------------------------------------------------------------------------------------------------------------------------------------------------------------------------------------------------------------------------------------------------------------------------------------------------------------------------------------------------------------------------------------------------------------------------------------------------------------------------------------------------------------------------------------------------------------------------------------------------------------------------------------------------------------------------------------------------------------------------------------------------------------------------------------------------------------------------------------------------------------------------------------------------------------------------------------------------------------------------------------------------------------------------------------------------|
| <p>MK149<br/>SZ4-L-M3-TE</p> | <p>MQKVAELKNRVAVKLNREQLKKNKVEELKNRNAYLKNELATLENEVARLENDVAEGGSGGGSGKLDPIAIVSMACRLPG<br/> GVNTPQRLWELLREGGETLSGFPTDRGWDLARLHHPDPNDPNTSYPVDKGGFLDDAAGFDAAEFFGVSPREAAAMDPQQRLL<br/> LETSWELVENAGIDPHSLRGTATGVFLGVAKFGYGEDTAAAEDVEGYSVTGVAPAVASGRISYTMGLEGPSISVDTACSSSL<br/> VALHLAVESLRKGESSMAVVGGAAVMATPGVFVDFSRQRALAADGRSKAFGAGADGFGFSEGVTLLVLLERLSEARRNGH<br/> EVLAVVRGSALNQDGASNGLSAPSGPAQRRVIRQALESGLPEGDVDAVEAHGTGTALGDPIEANALLDITYGRDRDADRP<br/> LWLGSVKSNIIGHTQAAAGVTGLLKVVLLALRNGELPATLHVEEPTPHVDWSSGGVALLAGNQPWRRGERTRRARVSAFGIS<br/> GTNAHVIVEEAPEREHRETTAHDGRPVPLVVSARTTAALRAQAAQIAELLERPDADLAGVGLGLATTRARHEHRAAVVAST<br/> REEAVRGLREIAAGAATADAVVEGVTEVDGRNVVFLFPGQGSQWAGMGAELLSSSPVFAGKIRACDESMAPMQDWKVS<br/> VLRQAPGAPGLDRVDVVPVLFVAVMVSLAELWRSYGVPEAAVVGHSQGEIAAAHVAGALTLEDAAKLVVGRSRLMRSLS<br/> GEGGMAAVALGEEAVRERLRPWQDRLSVAAVNGPRSVVVSVEGPGALRAFSEDCAAEGIRVRDIDVDYASHSPQIERVREE<br/> LLETTGDIAPRPARVTFHSTVESRSMGTELDARYWYRNLRETVRFADAVTRLAESGYDAFIEVSPHPVVVQAVEEAVEEA<br/> DGAEDAVVVGSLHRDGGDLAFLRSMATAHVSGVDIRWDVALPGAAPFALPTYPFQRKRYWLQPAAPAAASDELAYRVS<br/> WTPIEKPESGNLDGDWLVVTPPLISPEWTEMLCEAINANGGRALRCEVDTSASRTEMAQAVAQAGTGFRGVLSLLSSDESAC<br/> RPGVPAGAVGLLTLVQALGDAGVDAPVWCLTQGAVRTPADDDLARPAQTTAHGFAQVAGLELPGRWGGVVLDLPEVDD<br/> AALRLLVAVLRGGGRAEDHLAVRDGRLHGRRVVRASLPQSGRSWTPHGTVLVTGAASPVGDQLVRWLADRGAERLVL<br/> GACPGDDLLAAVEEAGASAVVCAQDAAALREALGDEPVTALVHAGTLTNFGSISEVAPEEFAETIAAKTALLAVLEL<br/> RAVEREYVCSSVAGIWGGAGMAAYAAGSAYLDALAEHHRARGRSCTSVAWTPWALPGGAVDDGYLRERGLRSLSDRA<br/> MRTWERVLAAGPVSVAADVDWPVLESEGFAATRPTALFAELAGRGGQAEAEPSGPTGEPAQRLAGLSPDEQQENLELV<br/> ANAVAEVLGHESAAEINVRRAFSELGLDSLNAMALRKRLSASTGLRLPASLVFDHPTVTLAQLHLSQLDSGTPAREASSAL<br/> RDGYRQAGVSGRVRSYLDLLAGLSDFREHFDGSDGFSLDLVDMDGPGEVTVICCAGTAAISGPHEFTRLAGALRGIAPVR<br/> AVPQPGYEEGEPLPSSMAA VAAVQADAVIRTQGDKPFVVAGHSAGALMAYALATELLDRGHPPRGVVLDVYPPGHQDA<br/> MNAWLEELTATLFDRETVRMDDTRLTALGAYDRLTGQWRPRETGLPTLLVSAGEPMGPWPPDSWKPTWPFHDTVAVPG<br/> DHFTMVQEHADAIARHIDAWLGGGNSKLAALAEHHHHHHH*</p> |
| <p>MK150<br/>(5)M1-L-SZ3</p> | <p>MSGDNGMTEEKLRRYLKRTVTELDVSTARLREVEHRAGEPVAVAMACRLPGGVSTPEEFWELLSEGRDAVAGLPTDRG<br/> WLDLSLFHPDPTRSGTAHQGGGFLTEATAFDPAFFGMSPREALAVDPQQRMLLELSWEVLERAGIPPTSLOASPTGVFVGL<br/> IPQEYGPRLAEGGEGVEGYLMTGTTTASVAGRIAYTLGLEGPAISVDTACSSSLVAVHLACQSLRRGESSLAMAGGVTVMPT<br/> PGMLVDFSRMNSLAPDGRCKAFSAGANGFGMAEGAGMLLLERLSDARRNGHPVLAVLRGTAVNSDGASNGLSAPNGRAQ<br/> VRVIQALAESGLPADIDAVEAHGTGTRLGDPIEARALFEAYGRDREQLHLGVSXSNLGHGTQAAAGVAGVIKMLAMR<br/> AGTLPRTLHASERSKEIDWSSGAISLLDEPEPWPAGARPRRAGVSSFGISGTNAHAHIEEAPQVVEGERVEAGDVVAPWVLSA<br/> SSAEGLRQAARLAAHLREHPGQDPRDIAYSLATGRAALPHRAAFAPVDESAALRVLDGLATGNADGAAVGTSAQQRAV<br/> FVFPQGWQWAGMAVDLLDTSPVFAAALRECADALEPHLDFEVIPFLRAEAARREQDAALSTERVDVVQPMFVAVMVS<br/> ASMWRAHGVPEAAVIGHSQGEIAAACVAGALSLDDAARVVALRSRVIAATMPGNKGMASIAAPAGEVRARIGDRVEIAAVN<br/> GPRSVVVAGDSDELDRLVASCTTECIRAKRLAVDYASHSSHVETIRDALHAELGEDFHPLPGFVPPFFSTVTGRWTQPELDA<br/> GYWYRNLRRTVRFADAVRALAEQGYRTFLEVSAPILTAHIEEIGDGGADLSAIHSLRRGDGSLADFGAALSRAFAAGVA<br/> VDWESVHLGTGARRVPLPTYPFQRERVWLEPKPVARRSTEVDEVSALRYRIEWRPTGAGEPARLDGTWLVAKYAGTADET<br/> STAAREALESAGARVRELVVDARCGRDELAERLRSVGEVAGVLSLLAVDEAEPEEAPLALASLADTSLVQAMVSAELGCP<br/> LWTVTESAVATGPFERVRNAAHGALWGVRVIALENPAVWGGGLVDVPAGSVAELARHLAAVVS GGAGEDQLALRADGV<br/> YGRRWVRAAAPATDDEWKPTGTVLVTGGTGGVGGQIARWLARRGAPHLLVSRSGPDADGAGELVAEALGARTTVA<br/> ACDVTDRESVRELLGGIGDDVPLSAVFHAAATLDDGTVDTLTGERIERASRAKVLGARNLHEL TRELDLTAFLVLFSSFAAF<br/> GAPGLGGYAPGNAYLDGLAQRRSDGLPATAVAWGTWAGSGMAEGPVADRFRRHGVIEMPPETACRALQNALDRAEVC</p>                                                                                                                                                                                                                                                                                                                                                                                                                                                                                            |

|                                                  |                                                                                                                                                                                                                                                                                                                                                                                                                                                                                                                                                                                                                                                                                                                                                                                                                                                                                                                                                                                                                                                                                                                                                                                                                                                                                                                                                                                                                                                                                                                                                                                                                                                                                                                                                                                                                                                                                                                                                                                                                                                                                                                                                                                                                                                                                                                                                                                                                                                                                                                                                                                                                                                                     |
|--------------------------------------------------|---------------------------------------------------------------------------------------------------------------------------------------------------------------------------------------------------------------------------------------------------------------------------------------------------------------------------------------------------------------------------------------------------------------------------------------------------------------------------------------------------------------------------------------------------------------------------------------------------------------------------------------------------------------------------------------------------------------------------------------------------------------------------------------------------------------------------------------------------------------------------------------------------------------------------------------------------------------------------------------------------------------------------------------------------------------------------------------------------------------------------------------------------------------------------------------------------------------------------------------------------------------------------------------------------------------------------------------------------------------------------------------------------------------------------------------------------------------------------------------------------------------------------------------------------------------------------------------------------------------------------------------------------------------------------------------------------------------------------------------------------------------------------------------------------------------------------------------------------------------------------------------------------------------------------------------------------------------------------------------------------------------------------------------------------------------------------------------------------------------------------------------------------------------------------------------------------------------------------------------------------------------------------------------------------------------------------------------------------------------------------------------------------------------------------------------------------------------------------------------------------------------------------------------------------------------------------------------------------------------------------------------------------------------------|
|                                                  | <p>PIVIDVRWDRFLLAYTAQRPTLRFDEIDDARRAAPQAAAEPVVGALASLPAPERKALFELVRSAAAFLGHASAERVPAD<br/> QAFaelGVDSLSaleLRNRLGAATGVRLPTTTVFDHPDVRTLAAHLAAELGGGSGGGSGNEVTTLENDAAFIENENAYLEK<br/> EIARLRKEKAALRNRLAHKKLEHHHHHH*</p>                                                                                                                                                                                                                                                                                                                                                                                                                                                                                                                                                                                                                                                                                                                                                                                                                                                                                                                                                                                                                                                                                                                                                                                                                                                                                                                                                                                                                                                                                                                                                                                                                                                                                                                                                                                                                                                                                                                                                                                                                                                                                                                                                                                                                                                                                                                                                                                                                                                    |
| <p>MK152<br/> SZ4-L-KR1-ACP1-<br/> L12-M3-TE</p> | <p>MQKVAELKNRVAVKLNREQLKKNVEELKNRNAYLKNELATLENEVARLENDVAEGGSGGGSGDEVSALRYRIEWRPTG<br/> AGEPARLDGTWLVAKYAGTADETSTAAREALESAGARVREL VVDARCGRDELAERLRSVGEVAGVLSLLAVDEAEPEEAP<br/> LALASLADTSLVQAMVSAELGCPLWTVTESAVATGPFERVRNAAHGALWGVGRVIALENPAVWGGLVDVPAGSVAELA<br/> RHLAAVVSGGAGEDQLALRADGVYGRRWVRAAAPATDDEWKPTGTVLVTGGTGGVGGQIARWLARRGAPHLLLVSRS<br/> PDADGAGELVAELEALGARTTVAACDVTDRESVRELLGGIGDDVPLSAVFHAAATLDDGTVDTLTGERIERASRAKVLGA<br/> RNLHEL TRELDLTAFLVLFSSFASAFGAPGLGGYAPGNAYLDGLAQRRSDGLPATAVAWGTWAGSGMAEGPVADRFRH<br/> GVIEMPPETACRALQNALDRAEVCPIVIDVRWDRFLLAYTAQRPTLRFDEIDDARRAAPQAAAEPVVGALASLPAPER<br/> KALFELVRSAAAFLGHASAERVPADQAFaelGVDSLSaleLRNRLGAATGVRLPTTTVFDHPDVRTLAAHLAAELGGAT<br/> GAEQAAPATTAPVDDPIAIVSMACRLPGGVNTPQRLWELLREGGETLSGFPTDRGWDLARLHHPDPDPNGTYSYVDKGGFLD<br/> DAAGFDAEFFGVSPREAAAMPDQQRLLLETSWELVENAGIDPHSLRGTATGVFLGVAKFGYGEDTAAAEDEVEGYSVTGVA<br/> PAVASGRISYTMGLEGPSISVDTACSSSLVALHLAVESLRKGESSMAVVGGAAVMATPGVFVDFSRQRALAADGRSKAFGA<br/> GADGFGFSEGVTLVLLERLSEARRNGHEVLA VVRGSALNQDGASNGLSAPSGPAQRRVIRQALESGLPEGDVDAVEAHGT<br/> GTALGDPIEANALLD TYGRDRADRPLWLGSVKSNIGHTQAAAGVTGLLKVV LALRNGELPATLHVEEPTPHVDWSSGGV<br/> ALLAGNQPWRRGERTRRARVSAFGISGTNAHVIVEEAPEREHRETTAHDGRPVPLVVSARTTAALRAQAQIAELLERPD<br/> DLAGVGLGLATTRARHEHRAAVVASTREEAVRGLREAAGAATADAVVEGVTEVDGRNVVFLFPGQGSQWAGMGAEELS<br/> SSPVFAGKIRACDESMAPMQDWKVS DVL RQAPGAPGLDRVDVQPVLFVVMVSLAELWRSYGVPEAAVVGHSQGEIAAA<br/> HVAGALTLEDAAKLVVGRSRLMRSLSGEGMAAVALGEAAVRERLRPWQDRLSVAAVNGPRSVVSGEPGALRAFSEDC<br/> AAEGIRVRDIDVDYASHSPQIERVREELLETTGDIAPRPARVTFHSTVESRSMDGTELDARYWYRNLRETVRFADAVTRLAE<br/> SGYDAFIEVSPHPVVVQAVEEAVEEADGAEDAVVVGSLHRDGGDLAFLRSMATAHVSGVDIRWDVALPGAAPFALPTYP<br/> FQRKRYWLQPAAPAAASDELAYRVS WTPIEKPESGNLDGDWL VVTPLISPEWTEMLCEAINANGGRALRCEVDTSASRTE<br/> MAQAVAQAGTGFRGVLSLLSSDESACRPGVPAGAVGLLTLVQALGDAGVDAPVWCLTQGAVRTPADDDLARPAQTTAHG<br/> FAQVAGLELPGRWGGVVDLPESVDDAALRLLVAVLRGGGRAEDHLAVRDGRLHGRRVRASLPQSGSRSWTPHGTVLVT<br/> GAASPVGDQLVRWLADRGAERLVLGACPGDDLLAAVEEAGASAVVCAQDAAALREALGDEPVTALVHAGTLTNFGSIS<br/> EVAPEEFAETIAAKTALLAVLDEVLGDRAVEREVYCSSVAGIWWGAGMAAYAAGSAYLDALAEHHRARGRSCTSVAWTP<br/> WALPGGAVDDGYLRERGLRSLSADRAMRTWERVLAAGPVSVAVADVDPVLPVLESEGFAATRPTALFAELAGRGGQAEAE<br/> DSGPTGEPAQRLAGLSPDEQENLLELVANAVAEVLGHESAAEINVRRAFSELGLDSLNAMALRKRLSASTGLRPLASL VFD<br/> HPTVTALAQHLSQLDSGTPAREASSALRDGYRQAGVSGR VRSYDLLAGLSDFREHFDGSDGFSLDL VDMADGPGEVTVI<br/> CCAGTAAISGPHEFTRLAGALRGIAPVRAVPQPGYEEGELPSSMAA VAVQADAVIRTQGD KPFV VAGHSAGALMAYAL<br/> ATELLDRGHPPRGVVLIDVYPPGHQDAMNAWLEELTATLFDRETVRMDDTRLTALGAYDRLTGQWRPRETGLPTLLVSAG<br/> EPMGPWPDSSWKPTWPFHDTVA VPGDHFTMVQEHADAIARHIDAWLGGGNSSSVDKLAAALEHHHHHHH*</p> |
| <p>MK168<br/> SZ4-L-KR5-ACP5(2)</p>              | <p>MQKVAELKNRVAVKLNREQLKKNVEELKNRNAYLKNELATLENEVARLENDVAEGGSGGGSGPIPTGGRARDEDDDW<br/> RYQVVWREA EWESASLAGRVLLVTGPGVPSSELSDAIRSGLEQSGATVLTCDVESRSTIGTAL EAADTDALSTVVSLLSRDGE<br/> AVDPSLDALALVQALGAAGVEAPLWVLRNAVQVADGELVDPAQAMVGGGLGRVVGIEQPGRWGGGLVDLVDADAASIRS<br/> LAAVLADPRGEEQVAIRADGIKVARLVPAPARAARTRWSPRGTVLVTGGTGGIGAHVARWLARSGAEHLVLLGRRGADAP<br/> GASELREELTALGTGVTIAACDVADRARLEAVLAAERAEGRTVSAMHAAAGVSTSTPLDDLTEAEFTEIADV KVRGTVNLD<br/> ELCPDLDAFVLFSSNAGVWGSPLASYAAAANAFLDGFAARRRSE GAPVTSIAWGLWAGQNMAGDEGGEYLR SQGLRAMD<br/> PDRAVEELHITLDHGQTSVSVVDMDRRRFVELFTAARHRPLFDEIAGARAEARQSEEGPALAQRLAALSTAERREHLAHLIR</p>                                                                                                                                                                                                                                                                                                                                                                                                                                                                                                                                                                                                                                                                                                                                                                                                                                                                                                                                                                                                                                                                                                                                                                                                                                                                                                                                                                                                                                                                                                                                                                                                                                                                                                                                                                                                                                                                                                                                                                                                                                   |

|                                              |                                                                                                                                                                                                                                                                                                                                                                                                                                                                                                                                                                                                                                                                                                                                                                                                                                                                                                                                                                                                                                                                                                                                                                                                                                                                                                                                                                                                                                                                                                                                                                                                                                                                                                                                                                                                                                                                                                                                                                   |
|----------------------------------------------|-------------------------------------------------------------------------------------------------------------------------------------------------------------------------------------------------------------------------------------------------------------------------------------------------------------------------------------------------------------------------------------------------------------------------------------------------------------------------------------------------------------------------------------------------------------------------------------------------------------------------------------------------------------------------------------------------------------------------------------------------------------------------------------------------------------------------------------------------------------------------------------------------------------------------------------------------------------------------------------------------------------------------------------------------------------------------------------------------------------------------------------------------------------------------------------------------------------------------------------------------------------------------------------------------------------------------------------------------------------------------------------------------------------------------------------------------------------------------------------------------------------------------------------------------------------------------------------------------------------------------------------------------------------------------------------------------------------------------------------------------------------------------------------------------------------------------------------------------------------------------------------------------------------------------------------------------------------------|
|                                              | <p>AEVAAVLGHGDDAAIDRDRAFRDLGFDSMTAVDLRNRLAAVTGVREAATVVFHDPTITRLADHYLERLVGTEVRGEAPSA<br/>LAGLDALEAALPEVPATEREELVQRLERMLAALRPVAQAADASGTGANPSGDDLGEAGVDELLEALGRELDGDPNSSSSVD<br/>KLA AALEHHHHHHH*</p>                                                                                                                                                                                                                                                                                                                                                                                                                                                                                                                                                                                                                                                                                                                                                                                                                                                                                                                                                                                                                                                                                                                                                                                                                                                                                                                                                                                                                                                                                                                                                                                                                                                                                                                                                                |
| <p>MK169<br/>SZ4-L-RIFS(KR1-<br/>ACP)(2)</p> | <p>MQKVAELKNRVAVKLNREQLKKNVEELKNRNAYLKNELATLENEVARLENDVAEGGSGGGSGGEPAPASAGDPLLGTV<br/>VSTPGSDRLTAVAQWSRRAQPWAVDGLVPNAALVEAIRLGDLAGTPVVGELVVDAPVVLPRRGSREVQLIVGEPGEQRR<br/>RPIEVFSREADEPWTRHAHGTLPAAAAVPEPAAAGDATDVTVAGLRDADRYGIHPALLDAAVRTVVGDDLLPSVWTGVS<br/>LLASGATAVTVTPTATGLRLTDPAGQPVLTVESVRGTPFVAEQGTTDALFRVDWPEIPLPTAETADFLPYEATSAEATLSAL<br/>QAWLADPAETRLAVVTGDCTEPGAAAIWGLVRSQAQSEHPGRIVLADLDDPAVLPVAVASGEPQVRVRNGVASVPRLTRVT<br/>PRQDARPLDPEGTVLITGGTGLGALTARHLVTAHGVRHLVLSRRGEAPELQEELTALGASVAIAACDVADRAQLEAVLR<br/>AIPAEHPLTAVIHTAGVLDDGVVTELTDPRLATVRRPKVDAARLLDEL TREADLA AFVLFSSAAGVLGNPQGAGYAAANAE<br/>LDALARQRNSLDLPAVSIAWGYWATVSGMTEHLGDADLRRNQIRIGMSGLPADEGMALLDAAIATGGTLVAAKFDVAALR<br/>ATAKAGGPVPLLRLGLAPLPRRAAAKTASLTERLAGLAETEQAALLDLVRRHAAEVLGHSGAESVHSGRTFKDAGFDSL<br/>AVELRNRLAAATGLTSPAMIFDYPKPPALADHLRAKLFGTEVRGEAPSA LAGLDALEAALPEVPATEREELVQRLERMLA<br/>ALRPVAQAADASGTGANPSGDDLGEAGVDELLEALGRELDGDPNSSSSVDKLA AALEHHHHHHH*</p>                                                                                                                                                                                                                                                                                                                                                                                                                                                                                                                                                                                                                                                                                                                                                                                                                                                                                                                                                                                                      |
| <p>MK170<br/>SZ4-L-M5-TE</p>                 | <p>MQKVAELKNRVAVKLNREQLKKNVEELKNRNAYLKNELATLENEVARLENDVAEGGSGGGSGKLEPIAIVGMACRFPG<br/>DVDSPEFWEFVSGGDAIAEAPADRGWEPDPDARLGGMLAAAGDFDAGFFGISPREALAMDPQQRIMLEISWEALERAG<br/>HDPVSLRGSATGVFTGVGTVDYGPRPDEAPDEVLYGVGTGTASSVASGRVAYCLGLEGPAMTVDTACSSGLTALHLAMES<br/>LRRDECGLLAGGVTVMSSPGAFTEFRSQGGLAADGRCKPFSKAADGFGLAEGAGVVLQRLSARREGRPVLAVLRGSA<br/>VNQDGASNGLTAPSGPAQQRVIRRALENAGVRAGDVYVEAHGTGTRLGDPVHALLSTYGAERDPPDPLWIGSVKSNIG<br/>HTQAAAGVAGVMKAVLALRHGEMPRTLHFDEPSPQIEWDLGAVSVVSQARSVPAGERPRRAGVSSFGISGTNAHVIVEEA<br/>PEADEPEPAPDSGPVPLVLSGRDEQAMRAQAGRLADHLAREPRNSLRDTGFTLATRRSAWEHRAVVVGDRDDALAGLRAV<br/>ADGRIADRTATGQARTRRGVAMVFPQGGAQWQGMARDLLRESQVFADSIRD CERALAPHVDWSLTDLLSGARPLDRVDV<br/>VQPALFAMVSLAALWRSHGVEPAAVVGHSQGEIAAAHVAGALTLEDAAKLVAVRSRVLRRGGQGGMASFGLGTEQA<br/>AERIGRFAGALSIVNGPRSVVAGESGPLDELIAECEAEGITARRIPVDYASHSPQVESLREELLTELAGISPVSAVALYST<br/>TTGQPIDTATMDTAYWYANLREQVRFQDATRQLAEAGFDFVEVSPHPVLTVGIEATLDSALPADAGACVVGTLRRDRGG<br/>LADFHTALGEAYAQGVVDWSPAFADARPVELPVYFQRQRYWLPIPTGGRARDEDDDWRYQVWVWREAEWESASLAGR<br/>VLLVTGPGVPSSELSAIRSGLEQSGATVLTCDVESRSTIGTALAAADTDALSTVVSLLSRDGEAVDPSLDALALVQALGAAG<br/>VEAPLWVLTRNAVQVADGELVDPAQAMVGGGLR VVGIEQPGRWGGGLVDLVDADAASIRSLAAVLADPRGEEQVAIRADG<br/>IKVARLVPAPARAARTRWSPRGTVLVTGGTGGIGAHVARWLARSGAEHLVLLGRRGADAPGASELREELTALGTGVTIAA<br/>CDVADRARLEAVLAAERAEGRTVSAVMHAAGVSTSTPLDDLTEAEFTEIADVKVRGTVNLDELCPDLDAFVLFSSNAGVW<br/>GSPGLASYAAANAFLDGFARRRRSEGAPVTSIAWGLWAGQNMAGDEGGEYLSQGLRAMDPDRAVEELHITLDHGQTSV<br/>SVVDMDRRRFVELFTAARHRPLFDEIAGARAEARQSEEGPALAQLAALSTAERREHLAHLIRA EVA AVLGHGDDAAIDRD<br/>RAFRDLGFDSMTAVDLRNRLAAVTGVREAATVVFHDPTITRLADHYLERLVSGTPAREASSALRDGYRQAGVSGR VRSYL<br/>DLLAGLSDFREHFDGSDGFSLDLVD MADGPGEVTVICCAAGTAAISGPHEFTRLGALRGIAPVRAVPQGYEEGEPLPSSMA<br/>AVAAVQADAVIRTQGDKPFVVAGHSAGALMAYALATELLDRGHPPRGVVLIDVYPPGHQDAMNAWLEELTATLFDRETV<br/>RMDDTRLTALGAYDRLTGQWRPRETGLPTLLVSAGEMGPWPDDSWKPTWPFEHDTVA VPGDHFTMVQEHADAIARHID<br/>AWLGGGNSKLA AALEHHHHHHH*</p> |

**Table S3: Yields of proteins used in this study.** If no indication is given the PKS domain/modules are derived from DEBS. Typical yields are presented.

| Construct | Protein               | Yield /mg/L of culture |
|-----------|-----------------------|------------------------|
| MK96      | KR1-ACP1(2)           | 8.6                    |
| MK111     | (5)KS1-AT1-SZ3        | 1.3                    |
| MK112     | SZ4-KR1-ACP1(2)       | 7.9                    |
| MK113     | (5)KS1-AT1            | 1.1                    |
| MK136     | SZ4-KR1-ACP1-M2-TE    | 0.9                    |
| MK137     | SZ4-KR5-ACP5-M6-TE    | 2.1                    |
| MK138     | SZ4-KR1-ACP1-M2-TE    | 3.4                    |
| MK141     | SZ4-KR1-ACP1-M5-TE    | 1.6                    |
| MK142     | SZ4-KR1-ACP1-M6-TE    | 1.4                    |
| MK147     | SZ4-M6-TE             | 7.9                    |
| MK148     | SZ4-M2-TE             | 1.5                    |
| MK149     | SZ4-M3-TE             | 3.8                    |
| MK150     | (5)M1-SZ3             | 15.3                   |
| MK152     | SZ4-KR1-ACP1-M3-TE    | 3.6                    |
| MK168     | SZ4-KR5-ACP5(2)       | 2.3                    |
| MK169     | SZ4-RIFS(KR1-ACP1)(2) | 9.8                    |
| MK170     | SZ4-M5-TE             | 3.3                    |
| BL12      | LDD(4)                | 6.7                    |
| BL13      | (5)M1(2)              | 2.4                    |
| BL16      | (3)M2-TE              | 1.6                    |
| BL17      | (3)M5-TE              | 0.8                    |
| BL18      | (3)M6-TE              | 4.9                    |
| RSG34     | (3)M3-TE              | 9.4                    |

### References:

- (1) Tang, Y., Kim, C., Mathews, I. I., Cane, D. E., and Khosla, C. (2006) The 2.7-Å crystal structure of a 194-kDa homodimeric fragment of the 6-deoxyerythronolide B synthase. *Proc. Natl. Acad. Sci.* *103*, 11124–11129.
- (2) Keatinge-Clay, A. T., and Stroud, R. M. (2006) The Structure of a Ketoreductase Determines the Organization of the  $\beta$ -Carbon Processing Enzymes of Modular Polyketide Synthases. *Structure* *14*, 737–748.
- (3) Reinke, A. W., Grant, R. A., and Keating, A. E. (2010) A synthetic coiled-coil interactome provides heterospecific modules for molecular engineering. *J. Am. Chem. Soc.* *132*, 6025–6031.
- (4) Thompson, K. E., Bashor, C. J., Lim, W. A., and Keating, A. E. (2012) SYNZIP Protein Interaction Toolbox: *in Vitro* and *in Vivo* Specifications of Heterospecific Coiled-Coil Interaction Domains. *ACS Synth. Biol.* *1*, 118–129.
- (5) Viegas, M. F., Neves, R. P. P., Ramos, M. J., and Fernandes, P. A. (2018) Modeling of Human Fatty Acid Synthase and *in Silico* Docking of Acyl Carrier Protein Domain and Its Partner Catalytic Domains. *J. Phys. Chem. B* *122*, 77–85.
- (6) Kapur, S., Lowry, B., Yuzawa, S., Kenthirapalan, S., Chen, A. Y., Cane, D. E., and Khosla, C. (2012)

Reprogramming a module of the 6-deoxyerythronolide B synthase for iterative chain elongation. *Proc. Natl. Acad. Sci.* 109, 4110–4115.

(7) Kao, C. M., Katz, L., and Khosla, C. (1994) Engineered biosynthesis of a complete macrolactone in a heterologous host. *Science* 265, 509–512.

(8) Pfeifer, B. A., Admiraal, S. J., Gramajo, H., Cane, D. E., and Khosla, C. (2001) Biosynthesis of complex polyketides in a metabolically engineered strain of *E. coli*. *Science* (80-. ). 291, 1790–1792.

(9) Chen, A. Y., Cane, D. E., and Khosla, C. (2007) Structure-Based Dissociation of a Type I Polyketide Synthase Module. *Chem. Biol.* 14, 784–792.

(10) Klaus, M., Ostrowski, M. P., Austerjost, J., Robbins, T., Lowry, B., Cane, D. E., and Khosla, C. (2016) Protein Protein Interactions, not Substrate Recognition, Dominates the Turnover of Chimeric Assembly Line Polyketide Synthases. *J. Biol. Chem.* 291, 16404–16415.

(11) Lowry, B., Robbins, T., Weng, C., Brien, R. V. O., Cane, D. E., and Khosla, C. (2013) In Vitro Reconstitution and Analysis of the 6-Deoxyerythronolide B Synthase. *J. Am. Chem. Soc.* 135, 16809–16812.

(12) Gokhale, R. S., Tsuji, S. Y., Cane, D. E., and Khosla, C. (1999) Dissecting and exploiting intermodular communication in polyketide synthases. *Science* 284, 482–485.
